1 **Molecular Regulation of NLRP3 Inflammasome Activation During Parasitic Infection**

2 Rasha Alonaizan <sup>a</sup>

3 <sup>a</sup> Faculty of Science, King Saud University, P.O. Box 2455, Riyadh 11451, Saudi Arabia

4 Correspondence: [ralonezan@ksu.edu.sa](mailto:ralonezan@ksu.edu.sa)

## 5 Abstract

6 Parasitic diseases are a serious global health concern, causing many common and severe infections,  
7 including Chagas disease, leishmaniasis, and schistosomiasis. The NLRP3 inflammasome belongs to  
8 the NLR (nucleotide-binding domain leucine-rich-repeat-containing proteins) family, which are  
9 cytosolic proteins playing key roles in the detection of pathogens. NLRP3 inflammasomes are  
10 activated in immune responses to *Plasmodium*, *Leishmania*, *Toxoplasma gondii*, *Entamoeba*  
11 *histolytica*, *Trypanosoma cruzi* and other parasites. The role of NLRP3 is not fully understood, but it is  
12 a crucial component of the innate immune response to parasitic infections and its functions as a sensor  
13 triggering the inflammatory response to the invasive parasites. However, while this response can limit  
14 the parasites' growth, it can also result in potentially catastrophic host pathology. This makes it  
15 essential to understand how NLRP3 interacts with parasites to initiate the inflammatory response.  
16 *Plasmodium* hemozoin, *Leishmania* glycoconjugate lipophosphoglycan (LPG) and *E. histolytica*  
17 Gal/GalNAc lectin can stimulate NLRP3 activation, while the dense granule protein 9 (GRA9) of *T.*  
18 *gondii* has been shown to suppress it. Several other parasitic products also have diverse effects on  
19 NLRP3 activation. Understanding the mechanism of NLRP3 interaction with these products will help  
20 to develop advanced therapeutic approaches to treat parasitic diseases. This review summarizes  
21 current knowledge of the NLRP3 inflammasome's action on the immune response to parasitic  
22 infections and aims to determine the mechanisms through which parasitic molecules either activate or  
23 inhibit its action.

24 **Keywords:** NLRP3 Inflammasomes, *Plasmodium*, *Leishmania*, *T. gondii*, *Entamoeba histolytica*  
25 *Trypanosoma cruzi*, *Helminths*

26 **Abbreviations:** NLR: Nucleotide-binding domain and leucine-rich repeat; NLRP3: NLR family pyrin  
27 domain containing 3; PAMPs: Pathogen associated molecular patterns; DAMPs: Danger associated  
28 molecular patterns; PRRs: Pattern recognition receptors; LPG: Leishmania glycoconjugate  
29 lipophosphoglycan; TLRs: Toll-like receptors; NLRs: NOD-like receptors; CLRs: C-type lectin  
30 receptors; RLRs: Rig-I-like receptor; GRA9: Dense Granule Protein 9; NOD: Nucleotide-binding  
31 oligomerization domain; LRR: Leucine-rich repeat; NLRP4: NLR family pyrin domain containing 4;  
32 NLRC4: NLR family CARD domain containing 4; AIM2: Absent-in-melanoma 2; PYD: Pyrin domain;  
33 NACHT: Nucleoside-triphosphatase; GPIs: Glycosylphosphatidylinositols anchor; Hz: Hemozoin;  
34 ASC: Apoptosis-associated speck-like protein containing a CARD; P2X7R: Purinergic Receptor P2X  
35 7; Src: Proto-oncogene tyrosine-protein kinase; Lyn: LYN Proto-Oncogene, Src Family Tyrosine  
36 Kinase; gDNA: Genomic DNA; IRF3: Interferon Regulatory Factor 3; SOCS1: Suppressor of cytokine  
37 signalling 1; LPG: Lipophosphoglycan; GP63: Glycoprotein-63; GPI: Glycosylphosphatidylinositol;  
38 LmSd: Leishmania major Seidman strain; LTB4: Leukotriene B4; LCL: Localized cutaneous  
39 leishmaniasis; ATG5: Autophagy related 5; CARD9: Caspase Recruitment Domain Containing Protein  
40 9; STAg: Soluble total Ag; ROP7: Rhoptry protein 7; TgP: Profilin from *T. gondii*; GRA 9: Dense granule  
41 protein 9; Gal/GalNAc: Galactose/ N-acetylgalactosamine; LPPG: Lipopeptidophosphoglycan; MIF:  
42 Migration inhibitory factor; EhMIF: *Entamoeba histolytica* Migration inhibitory factor; PGE2:

43 Prostaglandin E2; EhCP-A5 RGD: *E. histolytica* cysteine 5 proteinases contain an arginine-glycine-  
44 aspartate; CP5: Cysteine protease 5; Prx: Peroxiredoxins; Panx1: Pannexin-1; COX:  
45 Cyclooxygenase; EP4: Prostaglandin EP4 receptor; GIPLs: Glycophospholipids; TcAg: *T. cruzi*  
46 antigen; SEA: Schistosomal egg antigens; FhCL3: *Fasciola hepatica* cathepsin L3; FhHDM-1,  
47 *Fasciola hepatica* Helminth defense molecule-1; MLES: Muscle larvae excretory-secretory.

## 48 1. Introduction

49 Inflammasomes are intracellular multimeric complexes playing key roles in innate immunity against  
50 numerous pathogens and physiological stimuli, their action is important in regulating inflammatory  
51 response. Since excessive inflammation can be harmful to cells and tissues, whereas inadequate  
52 inflammation response can be beneficial for pathogens. Innate immunity response mostly involves the  
53 detection of pathogens or danger associated molecular patterns (PAMPs and DAMPs, respectively)  
54 by Pattern recognition receptors (PRRs) such as Toll like receptors TLRs, NOD-like receptors (NLRs)  
55 , C-type lectin receptors (CLRs) , and RIG-I-like receptors (RLRs) (2 ,1) .This will incuse a signaling  
56 cascade resulting in triggering inflammation response in attempting for the agent clearance.  
57 Contrasting to the other known PRRs, some members of the NLR family are unique in their capability  
58 to form an inflammasome complex to activate caspase-1, an enzyme that cleaves pro-inflammatory  
59 Interleukin-1 $\beta$  (IL-1 $\beta$ ) and Interleukin-18 (IL-18) leading to inflammation and pyroptosis a form of cell  
60 death of the infected cell (3).

61 Inflammasomes are parts of the innate response that contribute to the inflammatory response by  
62 stimulating the caspase-1 inflammatory pathway, resulting in the maturation of Interleukin-1 $\beta$  (IL-1 $\beta$ )  
63 and Interleukin-18 (IL-18), and pyroptotic cell death (4). The inflammasome is a signalling platform  
64 with three components (sensor, adaptor, and effector) that begin to form when endogenous and/or  
65 external threats are detected. Resulting in successive oligomerization of pro-caspase-1 to effector  
66 caspase-1. Inflammasomes are formed from five-member proteins, the nucleotide-binding  
67 oligomerization domain (NOD), leucine-rich repeat (LRR)-containing proteins, the NLR family  
68 members NLRP1, NLRP3, and NLRC4, the absent-in-melanoma 2 (AIM2), and pyrin (a bipartite  
69 adaptor protein) (5, 6).

70 The NLRP3 inflammasome is critical for host immune defences against several types of infections,  
71 including bacterial, fungal, and viral (7-10). It is mostly expressed as a result of inflammatory  
72 stimulation in antigen-presenting cells (APCs) such as macrophages, dendritic cells (DC), neutrophils,  
73 and monocytes (11). Interestingly, NLRP3 activation has been associated with the pathogenesis of  
74 certain inflammatory conditions, including cryopyrin-associated periodic syndromes (CAPS),  
75 Alzheimer's disease, diabetes, gout, autoinflammatory disease, and atherosclerosis (12, 13). NLRP3  
76 is a 118 kDa cytosolic protein expressed by a diversity of cells like lymphocytes, osteoblasts and  
77 neurons in addition to APCs. Its structure includes a multilateral protein complex containing an amino-  
78 terminal pyrin domain (PYD), which recruits proteins for inflammasome complex formation (14, 15). A  
79 central nucleotide-binding and oligomerization domain (NOD, NACHT domain), and a C-terminal

80 leucine-rich repeat (LRR) domain (16). The pyrin domain of NLRP3 interacts with the pyrin domain of  
81 ASC to trigger inflammasome formation (17). Similar to other inflammasomes, the NLRP3  
82 inflammasome complex contains a sensor (NLRP3 protein), an adaptor (apoptosis-associated speck-  
83 like protein, ASC), and an effector (caspase-1) (18, 19). NLRP3 is unable to bind to stimuli directly,  
84 and instead senses the frequent cellular signals triggered by their presence. Current models of the  
85 classical or canonical NLRP3 activation divide into two signalling steps, priming (signal 1) and  
86 activation (signal 2), in addition to non-canonical activation pathway (20).

## 87 **1.1 The NLRP3 inflammasome activation mechanism**

88 **1.1.1 The priming signal (signal 1)** is the first step required for NLRP3 Inflammasome activation,  
89 that is responsible for the transcriptional upregulation of NLRP3 and pro-interleukin (IL) -1 $\beta$  and pro-  
90 IL-18 (21). It occurs when a cell exposed to priming stimuli like LPS or necrosis factor (TNF) and IL-  
91 1 $\beta$  through TLRs, tumor necrosis factor receptor (TNFRs), NOD2, IL-1R respectively. The detection  
92 of these inflammatory stimuli causes the activation of proteins and nuclear factors such as myeloid  
93 differentiation primary response protein (MyD88), nuclear factor kappa-light-chain-enhancer of  
94 activated B cells (NF- $\kappa$ B) to increase NLRP3 and IL-1 $\beta$  transcription, leading to up-regulation of  
95 NLRP3 protein and pro-IL-1 $\beta$  (22). However, when these component molecules translocate from  
96 nucleus to cytoplasm they are in inactive forms and require a second signal to be activated (23).

97 **1.1.2 NLRP3 inflammasome activation (signal 2).** The second signal facilitates the oligomerization  
98 of the inactive inflammasome complex (NLRP3, ASC, and pro caspase-1), leading to the maturation,  
99 and up-regulation of the pro IL-1 $\beta$  and pro IL-18 (24, 25). Conflicting to other PRRs, NLRP3 can be  
100 activated by abundance of stimuli such as uric acid crystals, silica, asbestos, extracellular ATP, and  
101 toxins, plus to viral, bacterial, fungal, and protozoan molecules (26, 27). In addition, the second signal  
102 can be induced by several molecular events such as ionic flux, mitochondrial dysfunction, the  
103 production of reactive oxygen species (ROS), and lysosomal damage. (28). Although it is uncertain  
104 how NLRP3 is able to identify such different signals, it was proposed that NLRP3 senses a common  
105 cellular incident resulted by all stimuli rather than direct binding to them (29). Following the signal 2,  
106 the adaptor protein ASC and inactive pro-caspase-1 join together, then subsequently cleaving pro-  
107 caspase-1 into active caspase-1, which in turn cleaves pro-IL-1 $\beta$  and pro-IL-18 into their active form,  
108 plus activates the membrane pore-forming gasdermin D (GSDMD). GSDMDs N-terminal domain  
109 (GSDMD-NT) protein cleaves and oligomerizes to form pores in the cell membrane resulting in  
110 pyroptosis and the release of intracellular components, including inflammatory cytokines IL-1  $\beta$  and  
111 IL-18 (30).

112 **1.1.3 NLRP3 inflammasome activation via the noncanonical pathway.** NLRP3 inflammasome can  
113 be activated indirectly via a noncanonical pathway with the enrolment of caspase-11 in mice or the  
114 human analogs caspase-4/5. This noncanonical NLRP3 inflammasome pathway involves the direct  
115 senses and binding between these caspases and cytoplasmic LPS through TLR4, that will eventually

116 result in oligomerization and activation of NLRP3 inflammasome followed by the secretion of IL-1 $\beta$ /IL-  
117 18 and pyroptosis (31, 32).

118 Several studies have found that the NLRP3 inflammasome responds are key in controlling bacterial  
119 pathogens (33). Recently further studies have suggested that the NLRP3 inflammasome also plays  
120 an important role in the host's response to protozoan infection (34) This review focuses on current  
121 advances in research on NLRP3 inflammasome activation and its inflammatory response during  
122 different parasitic infections. In addition, it examines the immune evasion mechanisms of parasitic  
123 molecules that target the NLRP3 inflammasome response. We also outline novel approaches targeting  
124 NLRP3 signaling that could be developed as therapeutic alternatives to current anticancer treatment.

## 125 1.2 NLRP3 actions during parasitic infection

### 126 1.2.1 *Plasmodium*

127 Malaria is one of the most common infectious diseases caused by *Plasmodium* species and leads to  
128 worldwide human morbidity and mortality (35). According to the World Health Organization (WHO), in  
129 2020, an estimated 241 million new cases of malaria were recorded worldwide, resulting in half a  
130 million deaths (36). Malaria infections can be asymptomatic, have only mild symptoms, or be fatal,  
131 depending on factors such as parasite virulence and host genetics (37). Malaria symptoms are  
132 characterized by periodic paroxysms, severe anaemia and headaches, and can lead to metabolic,  
133 renal, and cerebral complications that can be fatal in untreated individuals (20).

134 *Plasmodium* is a eukaryotic organism capable of morphological alterations during its complex life cycle  
135 which includes both sexual and asexual stages within two different hosts (35). The *Plasmodium*  
136 species that infect humans are *P. falciparum*, *P. vivax*, *P. malariae*, *P. ovale*, and *P. knowlesi*, with *P.*  
137 *falciparum* being the most dangerous to humans (38, 39). *Plasmodium* is transmitted by a female  
138 *Anopheles* mosquito when it feeds on the host's blood. Once in the host, the parasite enters the blood  
139 stage of its development, which in humans is the stage that causes the pathology of malaria (23, 40).  
140 A strong immune response is therefore necessary to control the early infection and reduce disease  
141 severity (41).

142 The parasite produces several immunomodulatory molecules, such as glycosylphosphatidylinositols  
143 anchor (GPIs), hemozoin (Hz), and immunostimulatory DNA, that trigger strong innate immune  
144 mechanisms, including the production of phagocytic cells, NK cells and the expression of  
145 inflammasome-related genes such as MyD88, caspase-1, ASC, P2X7R, and NLRP3 (42, 43). The  
146 innate immune response to malaria infection is crucial to the development of the adaptive immunity  
147 needed to regulate parasite pathogenesis (44). This adaptive immunity includes promoting Th1  
148 responses to produce pro-inflammatory cytokines, such as IL-1 $\beta$ , IL-18, IL-12, tumour necrosis factor  
149 (TNF- $\alpha$ ), and interferon (IFN)- $\gamma$  to effectively clear the infection. However, under some conditions, the  
150 immune system may fail, resulting in a proinflammatory storm of cytokines such as IL-1 $\beta$ , IL-18, TNF-

151  $\alpha$  and IFN- $\gamma$  that associated with increased disease severity and poorer clinical outcomes (45, 46).  
152 However, many details of the immune response against intracellular parasites, including Malaria, are  
153 not fully understood.

154 NLRP3 inflammasome is a critical part of innate immune response and its activation is an important  
155 antimalarial mechanism. During infection NLRP3 inflammasome can be activated by erythrocyte  
156 *Plasmodium* molecules (47, 48). However, it is still unknown whether the inflammasome activation  
157 has a beneficial or harmful impact on host immunity and mortality during lethal malaria infection.  
158 Therefore, several studies have been conducted to understand the interaction of NLRP3  
159 inflammasome with *Plasmodium* during infection. The parasite feeds on the haemoglobin of red blood  
160 cells and generates a metabolic waste called hemozoin (Hz). A study using IL-1 $\beta$  deficient mice  
161 showed that Hz can induce IL-1 $\beta$  production via NLRP3 activation. The underlying signalling  
162 mechanism by which Hz triggers NLRP3 pathway activation and IL-1 $\beta$  production involves the Src  
163 kinase Lyn and the tyrosine kinase Syk (**Table 1**) (49) Moreover, Hz-dependent activation of NLRP3  
164 can be enhanced by uric acid released during malaria infection and suppressed by allopurinol (an  
165 inhibitor of uric acid synthesis) (50) (**Figure1** ). Velagapudi et al. found that incubating BV-2 microglia  
166 with HZ increases NLRP3 expression and caspase-1 activity (51) . Accordingly, these findings indicate  
167 that the ability of plasmodium product HZ to induce inflammasome action.

168 NLRP3 activation may also induce neuroinflammation during cerebral malaria (CM), a type of malaria  
169 with high mortality and affecting approximately 3 million individuals each year (52). High  
170 concentrations of proinflammatory cytokines and chemokines, such as TNF- $\alpha$ , IL-6, IL1 $\beta$ , IFN- $\gamma$ , and  
171 CXCL10, are often correlated with the progression of CM (53). One study found that decreasing  
172 NLRP3 activation by injecting mice with IL-33 cytokines in combination with antimalarial drugs,  
173 significantly reduced the progression of CM. Consistent with this, inhibiting the NLRP3 inflammasome  
174 directly by MCC950 phenocopied inhibitor, promotes the protective role of IL33 towards CM (54). This  
175 suggests that the level of NLRP3 activation during *Plasmodium* infection influences CM progression,  
176 and that targeting the NLRP3 inflammasome to reduce its activation could be an excellent  
177 pharmacological strategy for treating CM.

178 It has been mentioned that malarial pigment Hz can active the NLRP3 inflammasome, however, this  
179 activation has negative influence in conventional CD8 $\alpha$ + type 1 dendritic cell (cDC1) abundance,  
180 phagocytosis and T cell activation *in vivo* (55). Eventually, this will advantage the parasite by reducing  
181 the effectiveness of the anti-*Plasmodium* humoral response. Hz has previously been found to carry  
182 plasmodial DNA into a subcellular compartment reachable by Toll-like receptor 9 (TLR9), resulting in  
183 inflammatory signals. An *in vitro* study applying synthetic Hz coated with plasmodial genomic DNA  
184 (gDNA), or CpG-oligonucleotides, found that DNA-complexed Hz prompted TLR9 translocation  
185 resulting in activation of the NLRP3 and AIM2 inflammasomes. These findings suggest that Hz and  
186 DNA collaborate to induce systemic inflammation during malaria (56) (**Figure2**).

187 Many studies aim to comprehend the effects of NLRP3 deficiency during malaria. For instants, a study  
188 in NLRP3-deficient mice infected with lethal *Plasmodium yoelii* YM, found increased IFN-I cytokine  
189 production and a high survival rate in parallel with reduced IL-1 $\beta$  production. Other findings show that  
190 NLRP3 and IL-1 $\beta$  knockout mice do not experience increased body temperature during the acute  
191 phase of *P. chabaudi Adami* infection, and only exhibit mild symptoms (49). Mice deficient in  
192 inflammasome sensors AIM2, NLRP3, or adaptor caspase-1, and infected with *Plasmodium yoelii* YM,  
193 show increased production of IFN-I cytokines and IL-1 $\beta$  production, and increases IFN-I production.  
194 Since inflammasome activation involves the induction of IL-1 $\beta$ -mediated MyD88-TRAF3-IRF3  
195 signalling and upregulation of suppressor of cytokine signalling 1 (SOCS1). A study found that  
196 inhibition of MyD88-IRF7-mediated-IFN-I signalling by SOCS1 reduces the cytokine production in  
197 plasmacytoid dendritic cells. In addition, the lack of inflammasome components decreases SOCS1  
198 stimulation, causing inhibition of MyD88-IRF7-dependent-IFN-I signalling, resulting in increased IFN-  
199  $\alpha/\beta$  secretion and host survival. These effects indicate some of the negative aspects of inflammasome  
200 activation in the regulation of IFN-I pathways (57). However, IFN-I pathways show conflicting roles  
201 during *Plasmodium* infections, due to the organism's complex life cycle (**Figure2**).

202 NLRP3 has been targeted in many malaria vaccines, such as QS-21, a soluble saponin adjuvant that  
203 induces IL-1 $\beta$ /IL-18 production and promotes Th1 responses in macrophages and dendritic cells (58).  
204 Developing vaccination candidates against malaria that target the NLRP3 pathway, may lead to better  
205 infection control. However, examining the role of NLRP3 activation in vaccine development for malaria  
206 is beyond the scope of this review.

207 It may conclude that plasmodium molecules such as Hz and (gDNA), and CpG-oligonucleotides have  
208 an immunostimulatory effect in NLRP3 inflammasome. While there is no confirmed direct interaction  
209 between GPI anchors and NLRP3, a study indicated that GPIs can activate TLRs to produce  
210 proinflammatory cytokines such as IL-1 $\beta$  (59). Moreover, activation of NLRP3 *Plasmodium* infections  
211 can worsen CM progression because of its suppressant action on IL-33 production. In addition,  
212 activation of NLRP3 can benefit the parasite by reducing both T cell activation and the humoral  
213 response, resulting in worsening infection and poorer prognoses. In contrast, lower NLRP3 activation  
214 increases the production of IFN-I cytokines and reduces disease symptoms. These results imply that  
215 the inhibition of inflammasome activation could be a valuable target in the development of effective  
216 malaria treatments.

### 217 **1.2.2 Leishmania**

218 *Leishmania* is an intracellular parasite that can cause leishmaniasis, a tropical and subtropical  
219 infectious disease. *Leishmania* is transmitted to humans by the bite of sandflies such as *Phlebotomus*  
220 and *Lutzomyia* (60). Leishmaniasis has been characterized by WHO as one of the seven most  
221 important tropical diseases and is prevalent in North East Africa, Southern Europe, the Middle East,  
222 South eastern Mexico, and Central and South America. It is a complex disease, with significant clinical

223 and epidemiological diversity and gives rise to a broad spectrum of symptoms and in some cases can  
224 lead to death (61). Worldwide, 1.5 to 2 million new cases occur each year, resulting in 70,000 deaths.

225 *Leishmania* progresses through two main developmental stages each with its own morphology:  
226 promastigotes and amastigotes. Promastigotes are able to move within the gut of the sand fly, while  
227 amastigotes live intracellularly in mammalian cells such as macrophages. More than 20 different  
228 *Leishmania* species are known to cause disease in humans like *L. major*, *L. mexicana*, *L.*  
229 *amazonensis*, and *L. brasiliensis* are the cause of cutaneous infections of the skin. However, the most  
230 severe and sometimes fatal disease is caused by *L. donovani* and *L. infantum*. These species infect  
231 the host systematically, resulting in visceral leishmaniasis which accounts for a total of 70,000 deaths  
232 (62). Clinical manifestations are influenced by the species of *Leishmania* and the immune response  
233 of the host, and range from localized cutaneous infections to the potentially lethal visceral form (63).

234 After transmission of *Leishmania* parasites by sandflies, clinical manifestation of the infection requires  
235 mechanisms that allow the parasites to proliferate in the mammalian host and attack, resulting in  
236 initiating the innate and adaptive antileishmanial defence. *Leishmania* parasites' ability to challenge  
237 the host's immune response and eventually establish a chronic infection, makes the disease extremely  
238 difficult to treat. The rapid clearing of pathogens, and further shaping of the adaptive immune  
239 response, is vital for controlling infection and improving disease outcomes (64). Both innate and  
240 adaptive immunity are therefore essential for the host's defence against *Leishmania*. The innate  
241 response is initiated by a complex interaction between parasitic molecules, such as lipophosphoglycan  
242 (LPG), glycoprotein-63 (GP63), and glycosylphosphatidylinositol (GPI), and the receptors of the  
243 antigen-presenting cells (APCs) (65). This interaction represents a type I immune response, and  
244 involves the production of IL-12 followed by IFN- $\gamma$ -secreting. This leads to the initiation of the  
245 macrophages' microbicidal mechanisms (66). Adaptive immunity is essential for improving disease  
246 outcomes and to fully eliminate the infection and create long-lasting response memories against re-  
247 infection by *Leishmania* (37). Several proinflammatory cytokines are secreted during the adaptive  
248 phase, such as TNF- $\alpha$ , IFN- $\gamma$ , IL-1 $\beta$ , IL-12, and IL-18 which together form an inflammatory response  
249 regulating parasite growth and infection outcome (67).

250 Recent advances in research have indicated crucial role for NLRP3 inflammasomes during  
251 Leishmaniasis. NLRP3 inflammasomes exert strong control over IL-1 $\beta$  and IL-18 production, and these  
252 cytokines are considered key mediators during *Leishmania* infections both *in vitro* and *in vivo* (68, 69).  
253 One study infected mouse macrophage with different *Leishmania* species, such as *L. amazonensis*,  
254 *L. braziliensis*, and *L. Mexicana* and found induction of caspase-1 activation and IL-1 $\beta$  production was  
255 dependent on the NLRP3 inflammasome. Furthermore, NLRP3 knockout mice were found to be  
256 extremely susceptible to *L. amazonensis* infection in comparison to WT control mice, indicating the  
257 protective role of NLRP3 inflammasome activation. This protective role involves IL-1 $\beta$  production, and  
258 therefore NO secretion, which contributes to the *Leishmania* killing mechanism (70). In contrast,  
259 infection of C57BL/6 mice with the *L. major* Seidman strain (*LmSd*) (isolated from a patient with chronic  
260 lesions), results in unhealed lesions, uncontrolled parasite growth and full destruction of the ear



261 dermis. This is accompanied by IL-1 $\beta$  production within dermal cells and remarkable neutrophil  
262 recruitment to the infected skin. Similarly, the severity of lesions in tegumentary leishmaniasis (TL)  
263 patients has been associated with increased expression of AIM2, which is part of the NLRP3  
264 inflammasome (71, 72). However, mice deficient in NLRP3, ASC, and caspase-1/11, or lacking IL-1 $\beta$   
265 or IL-1 receptors, have better lesions repair and parasitic elimination, due to the absence of IL-1 $\beta$  -  
266 which affects neutrophils' local enrolment and therefore suppresses inflammation (72). The production  
267 of IL-1 $\beta$  dependent on NLRP3 inflammasome activation may be limits neutrophil recruitment, and  
268 causes non-healing forms of cutaneous leishmaniasis in commonly resistant mice. In contrast, a study  
269 found that infecting susceptible BALB/c mice with *L. major* induced severe footpad swelling and  
270 parasite burden, whereas NLRP3<sup>-/-</sup> BALB/c mice showed considerably reduced footpad swelling and  
271 the parasite burden. This suggests NLRP3 activation has a negative impact on BALB/c mice during  
272 infections with *L. major*. The authors propose that IL-18 might promote *L. major* survival by  
273 suppressing Th1 cell responses (73).

274 In another study aiming to understand the role of the NLRP3 inflammasome in Th1/Th2 responses  
275 during leishmaniasis, knockout BALB/c mice for NLRP3, ASC, or caspase-1, displayed deficient IL-1 $\beta$   
276 and IL-18 production and were resistant to cutaneous *L. major* infection. This study also indicates that  
277 the production of IL-18 enhances disease susceptibility in BALB/c mice by stimulating anti-  
278 inflammatory cytokine production. Neutralization of IL-18 in these animals lowered the *L. major* burden  
279 and reduced footpad swelling (74). These studies all suggest that IL-18 neutralization could be a  
280 potential pharmacological approach in the treatment of leishmaniasis patients.

281 Several studies have been conducted to increase our understanding of the underlying mechanisms of  
282 NLRP3 activation during leishmaniasis. For instant, Inflammasome activation during the onset stages  
283 of *L. amazonensis* infection in macrophages, seems to require ROS production through the NADPH  
284 oxidase mechanism, and the engagement of Dectin-1 and a C-type lectin receptor via spleen tyrosine  
285 kinase (Syk) signals. Therefore, inflammasome activation in response to *L. amazonensis* is decreased  
286 by the deficiency of NADPH oxidase, Syk, focal adhesion kinase, and proline-rich tyrosine kinase 2,  
287 as well as by the absence of Dectin-1. Further experiments confirmed this using Dectin-1 knockout  
288 mice, where Dectin-1 inflammasome activation was found to be important in controlling the parasite  
289 burden in macrophages, and improving resistance to *L. amazonensis* infection *in vivo* (75). An  
290 alternative pathway has been suggested to participate in the NLRP3 inflammasome activation that  
291 helps control *L. amazonensis* infection. This pathway is facilitated by the P2X7 receptor and LTB4 and  
292 depends on the production of IL-1 $\beta$  via non-canonical NLRP3 inflammasome activation (76). This is  
293 supported by the finding that inflammasome genes like IL-1 $\beta$ , NLRP3, and P2RX7, are upregulated in  
294 localized cutaneous leishmaniasis (LCL) patients (77). Furthermore, Carvalho et al. found that the  
295 parasite membrane glycoconjugate lipophosphoglycan (LPG) triggers the NLRP3 inflammasome  
296 pathway via caspase-11 activation in macrophages and *in vivo* (78). These studies propose possible  
297 pathways for the activation of the NLRP3 inflammasome during *Leishmania* infection and improve our  
298 understanding of the immunological role of NLRP3 activation in the host's immune response.

299 Understanding these mechanisms is important for the development of new therapeutic strategies to  
300 limit leishmaniasis progression (**Figure2**).

301 As discussed, different species of *Leishmania* can suppress the production of IL-1 $\beta$  both *in vitro* and  
302 *in vivo*. In this context, Shio et al., found that *L. mexicana* reduces IL-1 $\beta$  macrophage production  
303 through its virulence factor GP63 (the metalloprotease expressed by all *Leishmania* species). Also,  
304 the reduction of IL-1 $\beta$  production has been associated with the inhibition of reactive oxygen species  
305 (ROS) secretion, which has been linked to NLRP3 inflammasome activation. This ROS suppression  
306 is thought to result from damaged PKC-mediated protein phosphorylation. This finding indicates that  
307 the *Leishmania* surface GP63 molecule can significantly suppress NLRP3 inflammasome activation,  
308 resulting in a reduction of IL-1 $\beta$  production (79). *Leishmania*, therefore, employs a unique protective  
309 mechanism to manipulate the host's immune response. A subsequent study found that BALB/c mice  
310 infected with *L. donovani* produced IL-1 $\beta$  when given the antileishmanial drug Amp B. In contrast,  
311 administering the anti-IL-1 $\beta$  antibody to infected Amp B-treated mice increased the parasitic burden.  
312 This suggests that *Leishmania* is able to inhibit NLRP3 inflammasome activities, which in turn  
313 suppresses caspase-1 activation, and therefore IL-1 $\beta$  maturation, which is accompanying with  
314 reduction in NF- $\kappa$ B activity (80). This study also used gene silencing of A20 (a negative regulator of  
315 NF- $\kappa$ B signaling) or UCP2 (mitochondrial uncoupling protein 2) in macrophages infected with  
316 *Leishmania* and concluded that *Leishmania* utilizes A20 and UCP2 to prevent inflammasome  
317 activation, resulting in their multiplication (80). Furthermore, the *Leishmania* RNA virus (LRV) is a key  
318 virulence factor related to the progression of mucocutaneous leishmaniasis, a severe form of the  
319 disease (47). A study that combined data from humans and animals revealed that LRV stimulates  
320 TLR3 and TRIF to trigger type I IFN production, resulting in autophagy. This leads to Autophagy related  
321 5 (ATG5) expressions which mediated the breakdown of NLRP3 and ASC, thus reducing NLRP3  
322 inflammasome activation in macrophages (48). Also, it is suggested that LRV inhibits caspase-11  
323 activation and IL-1 $\beta$  production dependent on both TLR3 and ATG5. Therefore, this signalling pathway  
324 utilized by LRV is in the parasite's favour by increasing its survival and pathogenicity (81). It is clear  
325 that *Leishmania* develops several mechanisms to escape the host's immune response by targeting  
326 NLRP3 inflammasome activation resulting in suppression of inflammatory response (**Figure3**).

327 In summary, while the knockout mice studies indicate that NLRP3 activation during leishmaniasis is  
328 important for infection control, several studies have shown that the lack of NLRP3 also leads to a  
329 reduction in infection severity and mortality. It seems, therefore, that multiple factors, such as the  
330 parasite species and susceptibility of the host to infection, influence NLRP3 activation and lead to its  
331 dual action during *Leishmania* infection. Antileishmanial therapeutics will need greater research into  
332 the molecular pathophysiology of NLRP3 inflammasome activation in response to viral leishmaniasis.

### 333 **1.2.3 *Toxoplasma gondii***

334 *Toxoplasma gondii* (*T. gondii*) is an intracellular parasitic organism able to infect all warm-blooded  
335 animals, including humans (where it infects about one-third of the global population) (82). Most

336 immune-competent individuals infected with *T. gondii* are asymptomatic or experience only mild and  
337 self-limiting illness (83). However, extremely virulent strains of *T. gondii* can result in ocular disease in  
338 immune-competent adults (82). Immunocompromised individuals may develop severe complications  
339 associated with *T. gondii* infection (83). Infection during pregnancy with *T. gondii* is particularly serious  
340 as congenital toxoplasmosis may develop, resulting in abortion or neonatal mortality (84).

341 The immune response to *T. gondii* infection is complex due to the high level of heterogeneity in the  
342 genetic backgrounds of hosts, and the diverse virulence of parasite strains (85). Immune responses  
343 during infection involve early production of pro-inflammatory cytokines, such as IL-12, to induce the  
344 production of IFN- $\gamma$  by natural killer (NK) cells, CD4+ T cells, as well as CD8+ T cells [4]. IL-12 and  
345 IFN- $\gamma$  are crucial in facilitating parasite death and controlling its growth (86). The adaptive immunity  
346 against *T. gondii* infection involves maintaining a balance between the cell-mediated and humoral  
347 immune response actions of Th1 and Th2 cells. The Th1 response provides a strong protective role,  
348 characterised by activation of dendritic cells (DC) to produce IL-12 (87). Th1 cells also produce IFN-  
349  $\gamma$  as well as TNF- $\alpha$  cytokines, which stimulate the macrophages' killing mechanisms against  
350 intraocular parasites (88).

351 Initiating the innate immune response is essential for controlling *T. gondii* infection. Limiting parasite  
352 proliferation appears to involve a defensive inflammasome-mediated response (89). *In vitro*, infecting  
353 murine bone marrow-derived macrophages with *T. gondii* activates the NLRP3 inflammasome,  
354 causing an increase in IL-1 $\beta$  production. Furthermore, infecting knockout mice for NLRP3, caspase-  
355 1/11, IL-1R or the adaptor protein ASC, causes a reduction in IL-18 secretion and an increase in the  
356 parasitic burden that eventually leads to host death (61). The activation of NLRP3 in a human fetal  
357 small intestinal epithelial infected with *T. gondii*, was mediated by P2X7R and resulted in IL-1  $\beta$   
358 production, and therefore inhibited *T. gondii* proliferation (90). Infecting macrophages with *T. gondii*  
359 have been found to activate P2X7R and limit parasite proliferation. This P2X7R activation pathway  
360 involves the initiation of NADPH-oxidase-dependent ROS production, and activating an  
361 inflammasome, resulting in increased IL-1 $\beta$  secretion and ROS generation (91). Furthermore, a study  
362 showed that NLRP3 was an inflammasome sensor activated during *T. gondii* infection in primary  
363 human peripheral blood cells, and its activation is mediated by the release of intracellular potassium  
364 (92). It is suggested that *T. gondii* activates the NLRP3 inflammasome in primary human peripheral  
365 blood monocytes via the Syk-CARD9/MALT-1-NF- $\kappa$ B signalling pathway, resulting in IL-1 $\beta$  production  
366 (93).

367 Several studies explore the potential parasitic components that can impact NLRP3 activation during  
368 *T. gondii* infection. For instance, the soluble total Ag (STAg) derived from *T. gondii* strain RH, has  
369 been shown to stimulate NLRP3 activation and thereby increase IL-1 $\beta$  secretion *in vitro* (94). A recent  
370 study revealed that the *T. gondii* secretory protein, rhoptry protein 7 (ROP7), can bond with the NACHT  
371 domain of NLRP3 in differentiated THP-1 cells, causing significant up-regulation in NF- $\kappa$ B expression  
372 and therefore inflammasome hyper activation via the IL-1 $\beta$ /NF- $\kappa$ B/NLRP3 pathway (64). More recent  
373 study on THP-1 cell line treated with Profilin from *T. gondii* (TgP) reported that an increase in NLRP3

374 expression resulting in IL-1 $\beta$  production (95). In contrast, Kim et al., found that Dense granule proteins  
375 9 (GRA9), a secretory protein produced by *T. gondii*, is involved in disrupting the formation of the  
376 NLRP3 inflammasome. The protein blocks the binding of apoptotic speck-containing (ASC)-NLRP3,  
377 and suppresses the effect of NLRP3 (96). In contrast, different *T. gondii* effector proteins, like GRA15,  
378 promote the NLRP3 inflammasome activation, resulting in IL-1 $\beta$  and IFN- $\gamma$  production in THP-1 cells.  
379 This induces iNOS expression and NO secretion, causing the inhibition of IDO1 expression and  
380 therefore increased *T. gondii* growth in hepatocytes (97). Additional effector proteins, such as GRA35,  
381 GRA42, and GRA43, also have a key role in *T. gondii* infection through pyroptosis stimulation and IL-  
382 1 $\beta$  production in Lewis's rat BMDMs. However, whether such effector proteins have direct interactions  
383 with NLRP3 has not been proven (98) (**Figure 3**).

384 Regarding the involvement of inflammasome during the chronic stage of toxoplasmosis. Studies on  
385 the immune response to *T. gondii* at the chronic infection stage have found a vacuolar antigen of the  
386 parasite present in the host's macrophages. This suggests that proliferation of the parasite is  
387 controlled through a unique pathway involving NLRP3 induction of CD8 T cell IFN- $\gamma$  responses [123].

388 The research discussed here indicates that *T. gondii* products are able to activate the NLRP3  
389 inflammasome, which then produces IL-1 $\beta$  to control the infection. In contrast, the absence of it or any  
390 of its components, results in increased parasitic growth and mortality, implying that NLRP3 activation  
391 during toxoplasmosis serves a protective function. This review also enhances our understanding of  
392 the NLRP3 activation mechanism during *T. gondii* infection, data of value for the development of drugs  
393 to improve infection outcomes. However, further studies are required to understand the role of other  
394 parasitic products in the NLRP inflammasome's activation.

#### 395 **1.2.4 *Entamoeba histolytica***

396 Amoebiasis is a parasitic disease that infects the large intestine of humans caused by an extracellular  
397 parasitic protozoan, *Entamoeba histolytica* (*E. histolytica*) (99). According to the WHO, 500 million  
398 people worldwide are infected with Entamoeba; only 10% of these individuals are infected with *E.*  
399 *histolytica*, while the remaining are infected with non-pathogenic species like *Entamoeba dispar* and  
400 *Entamoeba coli*. Annually, amoebiasis can result in 40,000–100,000 deaths, which makes it the fourth  
401 protozoan infection causing death (100). In general, the transmission route of *E. histolytica* to a host  
402 is by ingesting contaminated water or food due to faecal excretion of cysts or person-to-person contact  
403 (101). *E. histolytica* is a virulent pathogen that is able to secrete molecules to break down and kill the  
404 host tissues and cells, in addition to engulfing red blood cells (99). It infects the intestinal tract of  
405 humans, causing amoebiasis, which is clinically asymptomatic; however, an invasive host's intestinal  
406 may result in the disease manifesting including abdominal pain, watery or bloody diarrhoea and weight  
407 loss (102). In some cases, amoebas can breach the mucosal barrier of the intestine and travel to other  
408 organs, like the liver, lung, and, in some cases the brain, resulting in amoebic abscesses (103). *E.*  
409 *histolytica* is predominantly found in the large intestine without initiating symptoms; however, in

410 unknown conditions, the amoebae attack the mucosa and epithelium, causing intestinal amoebiasis,  
411 causing tissue lesions that progress to abscesses and a host acute inflammatory response (104).

412 Establishing an amoebic infection includes a critical balance between the parasite pathogenicity and  
413 immune response. Amoebas live in the outer mucus layer of the intestinal tract, where they can feed  
414 on gut bacteria. However, the reasons by which amoebas attack the host tissues are not completely  
415 known. After amoebas invade the tissues, the immune system triggers a response against the parasite  
416 (105). Nevertheless, the key immune mechanisms against amoebas are still poorly understood (106).  
417 Several studies with *E. histolytica* showed that trophozoites bind to TLR-2 and TLR-4 in human colonic  
418 cells through the carbohydrate recognition domain of the Galactose/ N-acetylgalactosamine  
419 (Gal/GalNac) lectin and the lipopeptidophoglycan (LPPG) located in the parasite surface. By acting  
420 as pathogen-associated molecular patterns (PAMPs), these amebic molecules trigger the classical  
421 TLR signalling pathway, prompting NFkB activation and increased expression of TLRs followed by  
422 inflammatory cytokines production (107). That includes IL1 $\beta$ , IL-6, IL-8, IL-12, IFN- $\gamma$ , and TNF- $\alpha$ , which  
423 further regulate the functions of the host immune response (108). Furthermore, the secretion of *E.*  
424 *histolytica* macrophage migration inhibitory factor (MIF) (EhMIF) is vital for initiating the intestinal  
425 inflammation during amoebic invasion (109). Macrophages are as well play a vital role in defence  
426 against amoebiasis via their production of a variety of inflammatory cytokines, such as IL-1 $\beta$ , IL-6, and  
427 IL-12 as well as NO, resulting in *E. histolytica* prolifration reduction (110-112). As part of the innate  
428 response during amoebic infection Prostaglandin E2 (PGE2) of *E. histolytica*, induces the secretion of  
429 IL-8, a potent neutrophil chemoattractant (113). An additional pro-inflammatory cytokine produced  
430 during amoebic infections is TNF- $\alpha$ , and its production is associated with *E. histolytica*-induced  
431 diarrhoea in children as well as tissue damage in the amoebic liver abscess in mouse models (114,  
432 115). Therefore, it can be suggested that amoeba-induced inflammatory response results in tissue  
433 injury that can favour amoeba invasion.

434 Adaptive immunity also plays a significant role in the host defence against *E. histolytica*. A study in  
435 C3H mice infected with *E. histolytica* found that the diminution of CD4+ cells significantly reduced both  
436 parasite growth and inflammation, which also correlated with a decline in IL-4 and IL-13 production  
437 (116). Thus, this study indicates that the importance of CD4+ T cells in mediating inflammation also  
438 contributes to the disease progress. Moreover, the type of cytokines produced from T cells might  
439 impact the disease outcome; for example, IFN- $\gamma$  as a pro-inflammatory has a protection role during  
440 amebiasis via initiating the killing mechanisms of neutrophils and macrophages to control amoebicidal  
441 activity (46, 74, 89, 173). In contrast, IL-4 is an anti-inflammatory involved in the acute phase and  
442 during amoeba's invasion (115, 117, 118). IL-10 is an additional cytokine with a central protective role  
443 during intestinal amoebiasis by triggering resistance to intestinal amoebiasis in B6 mice (119).  
444 Furthermore, CD8+ cytotoxic T cells can cause death to amoebas either directly or through the  
445 production of IL-17 (120). However, Treg cells have been identified in a model of amoeba infection,  
446 and their role is characterized by participating in the control and resolution of the inflammatory  
447 response to *E. histolytica* infection (169). Together, these studies suggest that cell-mediated immune  
448 responses have a significant contribution against *E. histolytica* infections. Therefore, the immune

449 system-activated inflammation seems a double-edged sword: it can defend the host from *E. histolytica*  
450 invasive infection or stimulate severe tissue damage, facilitating *E. histolytica* distribution.

451 It was found that the NLRP3 inflammasome activation played a significant role during *E. histolytica*  
452 infection leading to IL-1 $\beta$ /IL-18 production and parasitic clearance from tissue (121). Noticeable,  
453 NLRP3 inflammasome activation by *E. histolytica* does not trigger pyroptosis, which is a normal  
454 strategy of the host to remove intracellular parasites, as an alternative inflammasome can facilitate  
455 cell death leading to delay in the suppression of parasitic invasive, which can be unfavourable to innate  
456 host defences (122, 123). Following *E. histolytica* invasion into the lamina propria, macrophages  
457 immigrate to the site of infection and orchestrate robust inflammatory responses. This response  
458 includes priming and activating the NLRP3 inflammasome component genes, leading to the production  
459 of IL-1 $\beta$ /IL-18. It was found that Gal/GalNAc lectin can activate NF- $\kappa$ B and MAP kinase-signaling  
460 pathways in macrophages, resulting in upregulation of the transcription of proinflammatory cytokines  
461 in addition to NLRP3 inflammasome components and pro-IL-1 $\beta$  (124). A study in macrophages found  
462 that Gal/GalNAc is equivalent to LPS in upregulating the pro-IL-1 $\beta$  and NLRP3 expression and  
463 achieves the priming requirements for NLRP3 activation, which all need NF- $\kappa$ B activation. Thus, this  
464 study suggested that Gal/GalNAc as soluble ligands may trigger TLRs in macrophages (122) (**Figure**  
465 **2**).

466 Exceptionally, *E. histolytica*-prompted NLRP3 inflammasome activation includes direct interaction of  
467 intact live *E. histolytica* by Gal/GalNAc lectin-mediated binding (122). As a result of NLRP3 activation,  
468 the recruitment and activation of caspase-1 will occur, causing the cleaving of the precursor IL-1 $\beta$ /IL-  
469 18 into their bioactive form. Several studies also found that the release and processing of IL-1 $\beta$  in  
470 response to *E. histolytica* is caspase-1 dependent, since inhibition of caspase-1 using specific  
471 inhibitors reduce the release of these pro-inflammatory cytokines (125). Furthermore, the stimulating  
472 molecular mechanism of inflammasome and caspase-1 activation involves the formation of an  
473 intracellular bridge between cysteine proteinases containing an arginine-glycine-aspartate (RGD)  
474 binding with macrophages  $\alpha$ 5 $\beta$ 1 integrin (121). In supporting this, a study showed that when the  
475 Gal/GalNAc lectin interactions with macrophages, both  $\alpha$ 5 $\beta$ 1 integrin and NLRP3 are enrolled into an  
476 intracellular junction, enabling EhCP-A5 RGD domain to directly cooperate with  $\alpha$ 5 $\beta$ 1 integrin.  
477 Subsequently, this activation will trigger Src family kinase phosphorylation and opening of pannexin-  
478 1 (Panx1) channel to facilitate the rapid extracellular release of ATP. The free ATPs then return to  
479 macrophages via P2X7 receptors to initiate the second signal for NLRP3 inflammasome complex  
480 formation (126). Therefore, *E. histolytica* is also able to induce NLRP3 activation in a two-signal event;  
481 the first signal involves the direct *E. histolytica* interaction that is facilitated by the Gal/GalNAc lectin  
482 forms an immune cell synapse to induce EhCP-A5 RGD linking with  $\alpha$ 5 $\beta$ 1 integrin. The second signal  
483 occurs due to the extracellular ATP release acting in an autocrine manner via host P2X7 receptors to  
484 stimulate downstream signal transduction events. A study proposed that an EhCP-A5 RGD, expressed  
485 on the trophozoite surface and as secreted molecules, is essential for contact-dependent  
486 inflammasome activation (121). Notably, *E. histolytica* can induce inflammasome activation via the

487 efflux of potassium since the blocking of K<sup>+</sup> channel activity causes IL-1 $\beta$  inhibition (127). Also,  
488 Nlrp3<sup>-/-</sup> and Asc<sup>-/-</sup> mice showed reduced colonic production of IL-1 $\beta$  in response to live *E. histolytica*  
489 (121). Li et al., also found that trophozoites abundantly secrete peroxiredoxins (Prx) during host cell  
490 invasion, and Prx C-terminal is considered as the main functional domain that can trigger NLRP3 in  
491 macrophage, and its activation pathway involves the binding of Prx with either TLR4 or P2X7  
492 receptors (128). These findings suggest that *E. histolytica* can trigger the activation of NLRP3  
493 inflammasomes in a priming and activating fashion, resulting in an inflammatory response (**Figure 2**).

494 However, a study suggested that the lipid mediator prostaglandin E2 (PGE2) could modulate  
495 inflammatory response by inhibiting transcription of different pro-inflammatory genes such as IL-1 $\beta$ ,  
496 TNF- $\alpha$  and IL-8, therefore suppressing NLRP3 inflammasome (121). Mechanically, following PGE2  
497 signal transduction coupling with the EP4 receptor, adenylyl cyclase will be activated, resulting in up-  
498 regulated intracellular concentration of cyclic adenylyl monophosphate (cAMP) (129). Then, the  
499 Protein Kinase A (PKA), the key mediator of cAMP signalling kinase, directly phosphorylates the  
500 Ser295 position of NLRP3 and turns off its ATPase activities (121). Therefore, the self-oligomerization  
501 of NLRP3 and the inflammasome complex assembly are inhibited (130) (**Figure 3**). Thus, the  
502 Production of PGE2 plays a crucial role in disease pathogenesis and immune evasion during *E.*  
503 *histolytica* via inhibition of inflammasome activation. However, the mechanism of how this inhibition  
504 occurs and whether this is beneficial for *E. histolytica* are not yet clear.

505 Collectively, it has become well understood that as an extracellular parasite, *E. histolytica* can activate  
506 the NLRP3 inflammasome complex via direct interaction with the live parasite and macrophages.  
507 However, intercellular interaction also can include the activation of NLRP3 via Gal/GalNAc mediated  
508 adherence with macrophages, facilitating an intercellular bridge between EhCP-A5 and  $\alpha 5\beta 1$  integrin,  
509 resulting in the rapid extracellular release of ATP that will eventually activate the NLRP3  
510 inflammasome. Although PGE2 suppresses the activation of NLRP3, the actual immunological impact  
511 of this inhibition on either the host or parasite is still vague. It is clear that NLRP3 activation is one of  
512 the vital innate events during *E. histolytica*, resulting in an inflammatory response that will control the  
513 infection's progression. However, compared to another parasitic infection discussed here, it is  
514 noticeable that most studies regarding the NLRP3 inflammasome-*E. histolytica* interaction were *in vitro*  
515 studies. Thus, supplementary *in vivo* studies are required to evaluate the interaction between the  
516 parasite and the host's immune response within the complex network of biological influence and cross-  
517 regulatory pathways during amoebiasis. Like the influence of *E. histolytica* bioenvironmental, in which  
518 colonic cells are typically exposed to pathogenic and commensal organisms within the colon. Also, it  
519 is crucial to understand the overall impact of inflammasome activation or inhibition on either the host  
520 response or infection progression. Therefore, it can be proposed that the NLRP3 inflammasome action  
521 needs further investigation by applying additional *in vivo* experiments, including NLRP3 knockout  
522 animal models. Knowing the immunological functions of NLRP3 during amoebiasis will benefit in  
523 preventing the disease pathogenesis of *E. histolytica* infection.

## 524 1.2.5 *Trypanosome cruzi*

525 *Trypanosome cruzi* is the parasite that causes Chagas disease, a potentially fatal infection that can  
526 affect the heart and gastrointestinal tract (131). The WHO estimates that Chagas disease is the most  
527 important parasitic disease in the Americas, accounting for five times as many infections as malaria.  
528 In 2015, WHO estimated that 7 million people were infected, the majority living in Latin America, with  
529 25 million at high risk of contracting the chronic form of the disease (132). The spread of Chagas  
530 disease beyond the geographical areas it was once confined to, has transformed it into a global  
531 healthcare issue (133). *T. cruzi* is normally found in the guts of hematophagous triatomine bugs, and  
532 transmission occurs when infected bug faeces contaminate the bite site or mucous membranes of the  
533 host. *T. cruzi* can also be transmitted by transfusion, tissue transplants, and congenitally (134, 135).  
534 *T. cruzi* strains are classified into seven different type units (DTUs), TcI to TcVI and TcBat, whose  
535 virulence, and pathogenicity in the vertebrate host, differ greatly (136). Most patients are asymptomatic  
536 or have mild or nonspecific symptoms such as fever (135). However, 1% of patients develop severe  
537 acute disease (Chagas disease), with potentially fatal symptoms that include acute myocarditis,  
538 pericardial effusion, and meningoencephalitis (134, 137).

539 To establish chronic infection, *T. cruzi* triggers a complex response in the host immune system (138).  
540 Experimental models have shown that *T. cruzi* surface glycoproteins (mucins) and/or  
541 glycopospholipids (GIPLs), can activate the innate immune cells to produce IFN- $\gamma$ , TNF- $\alpha$ , IL-1 $\beta$ , and  
542 IL-6. These cytokines stimulate the production of NO and superoxide by macrophages which cause  
543 parasite death [135]. When mice are infected with *T. cruzi*, IFN- $\gamma$  and IL-12 trigger protective adaptive  
544 immunity, including the parasite-specific Th1 response (139). Generally, it is found that the resistance  
545 against acute experimental *T. cruzi* infection involves the activation of several innate immune  
546 receptors, such as Toll-like and Nod-like receptors, and the NLRP3 inflammasome (140).

547 As previously established, NLRP3 is an essential immunological component during *T. cruzi* infection.  
548 A study in mice evaluated the influence of *T. cruzi* virulence (low, medium, high) on the expression of  
549 several innate immune mediators, including NLRP3, and concluded that highly virulent *T. cruzi* strains  
550 upregulate the expression of NLRP3, caspase-1, IL-1 $\beta$  and iNOS mRNA in heart muscle more than  
551 strains with low or medium virulence. These effects may be responsible for the myocarditis and  
552 increased mortality associated with some *T. cruzi* infections (141). A study by Goncalves et al.,  
553 demonstrated that *T. cruzi* infection triggers IL-1 $\beta$  production in an NLRP3- and caspase-1-dependent  
554 manner in peritoneal macrophages (PMs), and that cathepsin-B was required for the activation of  
555 NLRP3. Importantly, NLRP3<sup>-/-</sup> and caspase1<sup>-/-</sup> mice were found to host more *T. cruzi* parasites than  
556 MyD88<sup>-/-</sup> and iNOS<sup>-/-</sup> mice (which are susceptible models for *T. cruzi* infection), showing that the  
557 NLRP3 inflammasome contributes to acute infection control. In addition, when these NLRP3 and  
558 caspase-1 knockout mice were infected with *T. cruzi*, they decreased NO production and limited  
559 macrophage-mediated parasite killing (142). These data demonstrate how the activation of NLRP3,  
560 and subsequent NO production, functions as a unique effector-killing mechanism to control *T. cruzi*  
561 infections. As described earlier, in 1% of patients *T. cruzi* infection develops into Chagas disease,



562 which may result in life-threatening meningoencephalitis. Of particular relevance to this aspect of *T.*  
563 *cruzi* infection, one study found that NLRP3 is activated within the microglia. This activation results in  
564 IL-1 $\beta$  and NO secretion which contributes to the pathogenesis of *T. cruzi* infection within the CNS  
565 (143).

566 It appears that NLRP3 has a critical function in regulating infection, hence various research has been  
567 undertaken to fully understand its activity. One mechanism proposed for the activation of the  
568 ASC/NLRP3 pathway by *T. cruzi*, includes K<sup>+</sup> efflux, lysosomal acidification, ROS production and  
569 lysosomal impairment. One study also observed that ASC and caspase-1 knockout mice infected with  
570 *T. cruzi* had higher mortality and heart inflammation, suggesting that inflammasomes play a critical  
571 role in host resistance to the parasite (144). Another study utilised wild-type (WT), ASC <sup>-/-</sup>, and NLRP3  
572 <sup>-/-</sup> macrophages, as well as human macrophages, and suggested that *T. cruzi* infection provokes  
573 delayed activation of inflammatory cytokine gene expression and IL-1 $\beta$  production in NLRP3 <sup>-/-</sup>  
574 macrophages. However, these macrophages showed significant reductions in intracellular parasite  
575 proliferation compared to WT controls. This study also found that caspase-1/ASC inflammasomes play  
576 a key role in the activation of IL-1 $\beta$  /ROS and NF- $\kappa$ B signalling of cytokine gene expression in human  
577 and mouse macrophages, which contributes to the control of *T. cruzi* infection (145). Research in  
578 human THP monocyte-derived macrophages found *T. cruzi* to strongly suppress TXNIP expression,  
579 an anti-oxidant inhibitor that facilitates caspase-1 activation upon recruitment to NLRP3 inflammasome  
580 (146). Furthermore, rapamycin-pretreated macrophages infected with *T. cruzi* have been found to  
581 show much greater NLRP3 and mitochondrial ROS (mtROS) expression compared to control cells.  
582 However, when mtROS production was inhibited in rapamycin-pretreated infected macrophages from  
583 NLRP3 KO mice, the parasitic replication significantly increased. Suggesting that mTOR suppression  
584 during *T. cruzi* infection triggers NLRP3 activation and mtROS production, causing macrophage  
585 inflammatory response that regulates *T. cruzi* proliferation (147). These data suggest that NLRP3  
586 inflammasome activation can be induced by *T. cruzi* resulting in inhibition of mTOR production and  
587 consequent limiting of parasite replication. The activation of the inflammasome is a specific strategy  
588 that necessarily influences inflammatory outcomes.

589 It is clear that macrophages are one of the major cell types mediating the recognition and modulation  
590 of immune responses during *T. cruzi* infection. For example, *T. cruzi* can facilitate the macrophage  
591 galactose-C type lectin (MGL 1) receptor to initiate the innate immune response. Stimulating MGL1  
592 knockout macrophages *in vitro* with *T. cruzi* antigen (TcAg) has been shown to reduce procaspase-1,  
593 caspase-1, and NLRP3 inflammasome expression. (148) (**Figure 3**). This finding reveals a possible  
594 mechanism for the NLRP3 activation pathway in macrophages during the immune response to *T.*  
595 *cruzi*. IL-1 $\beta$  production by macrophages is crucial for T cell activation during *T. cruzi* infection. Paroli  
596 et al., investigated the role of NLRP3 and caspase-1/11 in the differentiation and activation of T cells  
597 during acute infection with a *T. cruzi-Tulahuen* strain (149). They found that during infection,  
598 NLRP3<sup>-/-</sup> and C57BL/6 WT mice showed similar parasitemia and survival rates, although the parasite  
599 burden was greater in the livers of NLRP3<sup>-/-</sup> mice than WT mice. Suggesting that NLRP3 is not

600 needed for regulating parasitemia, but is still crucial for improved parasite clearance from the liver.  
601 Importantly, they found that the differentiation of T helper and cytotoxic T lymphocyte phenotypes  
602 depended on whether the mice were deficient in NLRP3 or caspase-1/11. Notably, caspase-1/11<sup>-/-</sup>  
603 mice showed a significant decrease in the number of IFN- $\gamma$ - and IL-17-producing CD4<sup>+</sup> and CD8<sup>+</sup> T  
604 cells, which are linked to higher parasite loads and lower survival (149). These results imply that  
605 NLRP3 pathway activation is vital for assembling an appropriate T cell response during *T. cruzi*  
606 infection. This finding reveals a possible mechanism for the NLRP3 activation pathway in macrophages  
607 during the immune response to *T. cruzi*. Autophagy is one of the effector mechanisms that limit *T.*  
608 *cruzi* infection. For example, a study showed that NLRP3 is needed to stimulate an autophagic flux  
609 during *T. cruzi* infection by mediating the autolysosome formation in peritoneal macrophages (PMs)  
610 from C57BL/6 WT mice, thereby limiting *T. cruzi* replication (148).

611 It is obvious that NLRP3 inflammasome activation is influenced by the strain of *T. cruzi* during the  
612 infection course. In addition, the NLRP3 knockout mice studies show that lacking this inflammasome  
613 significantly affects the macrophage-mediated parasite-killing mechanism, resulting in heart  
614 inflammation and higher mortality. NLRP3 deficiency also has an impact on the development of T cell  
615 responses during *T. cruzi* infection by reducing CD4<sup>+</sup> and CD8<sup>+</sup> T cell numbers, leading to higher  
616 parasite loads and lower survival. Inflammasome activation may contribute to inflammatory responses  
617 during *T. cruzi* infection, through its inhibitory effect on mTOR production, which reduces parasite  
618 growth. However, no studies have examined the potential role of parasitic surface proteins, such as  
619 Mucin and Trans-Sialidase, in either NLRP3 inflammasome activation or inhibition. NLRP3 activation  
620 may therefore have other functions during *T. cruzi* infection which remain to be discovered.  
621 Understanding these key immunological cellular pathways will help to develop drugs for controlling *T.*  
622 *cruzi* infection and limiting the immunopathology of Chagas disease.

### 623 **1.2.6 Helminths**

624 Helminths are complex, multicellular, parasitic worms occupying a wide range of geographical,  
625 ecological, and anatomical niches, and with highly complex life cycles. Helminths are categorised into  
626 three classes: nematodes (roundworms), platyhelminths (flatworms, including trematodes and  
627 cestodes), and annelids (segmented worms, including leeches) (150). It is estimated that  
628 approximately 2 billion individuals are infected with the parasite, making it the most common human  
629 infection in developing countries (151). Moreover, helminths have several invasion routes, including  
630 the skin (schistosomes and hookworms) and mosquito bite (filarial worms), but the most common is  
631 via the gastrointestinal tract (152). The disease in humans is normally caused by adult worms, egg  
632 deposition in tissues, or migration of larvae or microfilariae. Helminth infections are normally  
633 asymptomatic or mild, but immunologically naïve and immunosuppressed individuals can experience  
634 severe clinical outcomes (150).

635 Helminths can form long-term chronic infections during which the host immune response is severely  
636 suppressed (153). The remarkable distribution of helminth infections arises from their ability to

637 manipulate the host immune system by controlling its susceptibility, resistance, and pathogenesis  
638 (154). Although protective immunity to helminths in humans is not well understood, animal models of  
639 infection have indicated that human immunity is mediated by the Th2 response (154, 155). The latter  
640 seems to be targeted by the helminth immunoregulation mechanism as a means to establish a  
641 successful opportunistic parasite-host relation (152). Asymptomatic infection shows increased  
642 production of anti-inflammatory cytokines such as IL-10 and high levels of circulating T cells  
643 expressing the inhibitory marker CTLA-4 (cytotoxic T lymphocyte antigen 4) (156, 157). There is also  
644 inhibited production of Th1 inflammatory cytokines, such as IFN- $\gamma$  (158). However, in severe and  
645 deteriorating cases, lymphatic pathology develops with fewer regulatory T cells and increased Th1  
646 and Th17 effector responses - which might explain the severe lymphatic inflammation outcome (159).  
647 The relationship between these parasites and the host immune response is highly complex, and a full  
648 analysis is beyond the scope of this review.

649 Activation of the NLRP3 inflammasome plays a key role in helminth infections by provoking Th2 and  
650 Th17/inflammatory responses (160, 161). Potential stimuli for NLRP3 activation during infections are  
651 helminth products that are either soluble or exosomal, and endogenous signals from inflammation and  
652 injured tissue (161). One study found that soluble schistosomal egg antigens (SEA) can activate the  
653 NLRP3 inflammasome, resulting in IL-1 $\beta$  production in dendritic cells. SEA protein appears to function  
654 as a second signal for inducing proteolytic pro-IL-1 $\beta$  cleavage (**Figure 2**). Moreover when mice  
655 deficient in the central inflammasome adapter ASC, but had NLRP3 molecules infected with  
656 *Schistosoma mansoni*, they showed a reduction in IL-1 $\beta$  expression and liver immunopathology (162).  
657 In contrast, infecting WT mice with *Schistosoma japonicum* (*S. japonicum*) resulted in high expression  
658 of IL-1 $\beta$ , and NLRP3 activation. In examining this activation mechanism, Meng et al. observed that  
659 hepatic mouse stellate cells (HSCs) cultured with soluble egg antigen, induced NLRP3 inflammasome  
660 formation, which was linked to both redox regulation and lysosomal dysfunction (163). This suggests  
661 that NLRP3 inflammasome activation plays a role in initiating the inflammatory action that leads to  
662 liver fibrosis associated with *S. japonicum* infection. Several earlier studies have shown that the  
663 inflammatory action of NLRP3 inflammasomes during schistosomiasis in the liver could be limited by  
664 taurine (a sulfur-containing  $\beta$ -amino acid) (164). In mice infected with *S. japonicum*, taurine was found  
665 to suppress activation of the hepatic thioredoxin-interacting protein (TXNIP)/NLRP3 inflammasome,  
666 thereby preventing IL-1 $\beta$  production and pyroptosis. The study also found that NLRP3-deficient mice  
667 infected with *S. japonicum*, developed hepatosplenomegaly, liver dysfunction, hepatic granulomas,  
668 and fibrosis, and showed reduced NLRP3-dependent liver pyroptosis. The authors suggest that  
669 taurine's ability to control the activation of the TXNIP/NLRP3 inflammasome pathway might make it  
670 an effective preventative of liver pathology during *S. japonicum* infection (165).

671 Many studies examine the immunological action of NLRP3 during trematode infection. It is found that  
672 the FhCL3 helminth-derived molecules of *Fasciola hepatica* can induce non-canonical inflammasome  
673 activation in dendritic cells (DCs), resulting in IL-1 $\beta$  and IL-18 production, and this has been associated  
674 with the cysteine protease activity of FhCL3 - an independent caspase pathway. The activation of the  
675 NLRP3 inflammasome by FhCL3, prompts the adaptive immune response and is characterized by the

676 secretion of IFN- $\gamma$  and IL-13 (166). These data indicate that the helminth-derived molecule FhCL3,  
677 can activate the NLRP3 inflammasome in a caspase-independent manner. However, Alvarado et al.  
678 demonstrated that NLRP3 inflammasome activation can be inhibited by Helminth defence molecule-1  
679 of *F. hepatica* (FhHDM-1) (a cathelicidin-like peptide), resulting in a reduction in IL-1 $\beta$  secretion by  
680 macrophages (**Figure 3**). The inhibitory outcome was associated with lysosomal cathepsin B protease  
681 causing IL-1 $\beta$  production and effective Th1 response suppression, eventually parasite survival (167).  
682 Moreover, infected NLRP3 $^{-/-}$  mice with *Trichinella spiralis*, have been shown to host more larvae  
683 than WT mice. In supporting the finding, administration of WT mice with MLES (muscle larvae  
684 excretory-secretory products) showed higher levels of IL-4, IL-10, TGF- $\beta$ , and Tregs population, than  
685 NLRP3 $^{-/-}$  mice receiving the same treatment. This was carried out *in vitro* by treating WT-DCs with  
686 MLES, and resulted in upregulation of CD40 expression and increased production of IL-4, IL-10, TGF-  
687  $\beta$ , and Tregs populations. Conversely, treating NLRP3 knockout cells with MLES, caused  
688 downregulation of CD40 expression with increased production of IL-1 $\beta$ , IL-18, IL-10, and TGF- $\beta$ , but  
689 not IL-12p70 (168). This study explained the vital role NLRP3 plays in developing the Th2 and Treg  
690 responses of the host defence against *Trichinella spiralis*.

691 Although NLRP3 inflammasome activation seems to be important to host defences against helminth  
692 infections by regulating Th2 and Th17 responses, it can also cause uncontrolled inflammatory action  
693 that leads to liver immunopathology. This is confirmed by the NLRP3 knockout studies, where mice  
694 lacking the NLRP3 molecule had better disease outcomes. For instance, NLRP3-deficient mice  
695 infected with *Schistosoma japonicum* had reduced NLRP3-dependent liver pyroptosis. The absence  
696 of NLRP3 could also be favourable to parasite growth, as was indicated in the *Trichinella spiralis*  
697 infection studies. That the NLRP3 inflammasome appears to play a dual role in host defences against  
698 helminth infection might be due to the complexity of the parasite's life cycle. Currently, there are too  
699 few studies to fully determine the role of NLRP3 or its activation mechanism, in the host response to  
700 helminth infections. Exploring these areas would therefore be important for a fuller understanding of  
701 this inflammasome's contribution to anti-parasitic immune responses.

### 702 **1.3 Conclusion and Future Perspective**

703 The NLRP3 inflammasome has many effects on the host response during parasitic infection. In some  
704 cases, it successfully fulfils its immunological role and protects the host. In others, however, its  
705 immunological response may be counterproductive, damaging the host or advantaging the parasite's  
706 growth. Since NLRP3 inflammasome activation was found to exert significant control over *Leishmania*,  
707 *T.gondii* and *T. cruzi* infections. In addition, *E. histolytica* as extracellular can stimulate the NLRP3  
708 inflammasome activation via outside-in signalling independent of pyroptosis leading to an  
709 inflammatory response against the parasite. Conversely, NLRP3 deficiency is also beneficial to the  
710 host, as it limits the infection severity in malaria and leishmaniasis, while its absence affects the *T.*  
711 *cruzi*-killing mechanism of macrophages and the differentiation of T cell responses, resulting in greater  
712 parasite burdens. It is demonstrated that NLRP3 activation during helminth infection helps to control

713 the parasite by triggering Th2 and Th17 responses. However, for some types of helminth species, a  
714 lack of NLRP3 can also reduce the parasite burden carried by the host.

715 This review suggests that different parasitic products might have different effects on the NLRP3  
716 activation, and in some cases these effects could conflict, thereby accounting for the inflammasome's  
717 contrary influences. It has been found that plasmodium products like Hz and DNA are capable of  
718 stimulating NLRP3 activation. Yet, further studies are needed to determine the potential role of other  
719 plasmodium molecules like GPIs and immunostimulatory DNA, in the NLRP3 function. Since the  
720 ability of GPIs to activate NF-kB signaling through TLRs resulting in the production of pro-  
721 inflammatory cytokines particularly IL-1 $\beta$ , proposing that GPIs might possibly interact with NLRP3  
722 inflammasomes (162). However, further investigation is needed to prove this point. Several  
723 Leishmania molecules and their mechanical actions have also been reported in this review, including  
724 LPG, which can stimulate NLRP3 activation, whereas GP63 and LRV both suppress it (36, 52, 66). In  
725 addition, *T.gondii* products are found to be involved in the activation of NLRP3, such as STAg and  
726 ROP7 (51, 163). Conversely, GRA9 proteins show an anti-inflammatory response by suppressing  
727 NLRP3 formation (83). In the case of *E. histolytica* the adherence molecules like Gal/GalNAc and  
728 EhCP-A5 RGD together are able to mediate NLRP3 inflammasome activation, while the production  
729 of PGE2 by the parasite indirectly inhibits it (107, 121). As earlier remarked, compared to other  
730 parasitic infections, very few studies have been carried out on the interaction of NLRP3  
731 inflammasomes with *T. cruzi* and helminths molecules (**Table1**).

732 The evidence here suggests that the NLRP3 inflammasome's interaction with parasites and their  
733 molecules *in vivo* remains only preliminary and requires further confirmation. It has been proposed  
734 that whether the NLRP3 inflammasome is activated or inhibited during infection depends on the  
735 parasite and the host's genetic background. The host immune response, and the parasites' regulation  
736 of that response, are vital areas that must be studied to attain the knowledge necessary to develop  
737 effective vaccines and treatment approaches to control these infectious diseases. In addition, in this  
738 increasingly advanced field, this review may have further new ideas about parasitic molecules'  
739 influence on inflammasome actions that provide clear clinical opportunities to develop new therapeutic  
740 interventions to treat these diseases.

#### 741 **Conflicts of Interest:**

742 The author declares no conflict of interest.

#### 743 **Reference:**

- 744 1. Pétrilli V, Dostert C, Muruve DA, Tschopp J. The inflammasome: a danger sensing complex  
745 triggering innate immunity. *Current opinion in immunology*. 2007;19(6):615-22.  
746 doi:10.1016/j.coi.2007.09.002

- 747 2. Kawai T, Akira S. The roles of TLRs, RLRs and NLRs in pathogen recognition. *Int Immunol.*  
748 2009;21(4):317-37. doi:org/10.1093/intimm/dxp017
- 749 3. Miao EA, Rajan JV, Aderem A. Caspase-1-induced pyroptotic cell death. *Immunological*  
750 *reviews.* 2011;243(1):206-14. doi:org/10.1111/j.1600-065X.2011.01044.x
- 751 4. Franchi L, Eigenbrod T, Muñoz-Planillo R, Nuñez G. The inflammasome: a caspase-1-  
752 activation platform that regulates immune responses and disease pathogenesis. *Nature*  
753 *immunology.* 2009;10(3):241-7. doi:org/10.1038/ni.1703
- 754 5. Sharma D, Kanneganti T-D. The cell biology of inflammasomes: Mechanisms of  
755 inflammasome activation and regulation. *Journal of Cell Biology.* 2016;213(6):617-29.  
756 doi:org/10.1083/jcb.201602089
- 757 6. Lamkanfi M, Dixit VM. Mechanisms and functions of inflammasomes. *Cell.*  
758 2014;157(5):1013-22. doi:org/10.1016/j.cell.2014.04.007
- 759 7. Thomas PG, Dash P, Aldridge Jr JR, Ellebedy AH, Reynolds C, Funk AJ, et al. The  
760 intracellular sensor NLRP3 mediates key innate and healing responses to influenza A virus via the  
761 regulation of caspase-1. *Immunity.* 2009;30(4):566-75. doi:10.1016/j.immuni.2009.02.006
- 762 8. Allen IC, Scull MA, Moore CB, Holl EK, McElvania-TeKippe E, Taxman DJ, et al. The  
763 NLRP3 inflammasome mediates in vivo innate immunity to influenza A virus through recognition of  
764 viral RNA. *Immunity.* 2009;30(4):556-65. doi:10.1016/j.immuni.2009.02.005
- 765 9. Gross O, Poeck H, Bscheider M, Dostert C, Hanneschläger N, Endres S, et al. Syk kinase  
766 signalling couples to the Nlrp3 inflammasome for anti-fungal host defence. *Nature.*  
767 2009;459(7245):433-6. doi:org/10.1038/nature07965
- 768 10. Kanneganti T-D, Body-Malapel M, Amer A, Park J-H, Whitfield J, Franchi L, et al. Critical  
769 role for Cryopyrin/Nalp3 in activation of caspase-1 in response to viral infection and double-stranded  
770 RNA. *Journal of Biological Chemistry.* 2006;281(48):36560-8. doi:org/10.1074/jbc.M607594200
- 771 11. Zhong Y, Kinio A, Saleh M. Functions of NOD-like receptors in human diseases. *Frontiers in*  
772 *immunology.* 2013;4:333. doi:10.3389/fimmu.2013.00333
- 773 12. Menu P, Vince J. The NLRP3 inflammasome in health and disease: the good, the bad and  
774 the ugly. *Clinical & Experimental Immunology.* 2011;166(1):1-15. doi:org/10.1111/j.1365-  
775 2249.2011.04440.x
- 776 13. Guo H, Callaway JB, Ting JP. Inflammasomes: mechanism of action, role in disease, and  
777 therapeutics. *Nature medicine.* 2015;21(7):677-87. doi:org/10.1038/nm.3893

- 778 14. Rada B, Park JJ, Sil P, Geiszt M, Leto TL. NLRP3 inflammasome activation and interleukin-  
779 1 $\beta$  release in macrophages require calcium but are independent of calcium-activated NADPH  
780 oxidases. *Inflammation Research*. 2014;63:821-30. doi:org/10.1007/s00011-014-0756-y
- 781 15. Zahid A, Li B, Kombe AJK, Jin T, Tao J. Pharmacological inhibitors of the NLRP3  
782 inflammasome. *Frontiers in immunology*. 2019;10:2538. doi:10.3389/fimmu.2019.02538
- 783 16. Franchi L, Warner N, Viani K, Nuñez G. Function of Nod-like receptors in microbial  
784 recognition and host defense. *Immunological reviews*. 2009;227(1):106-28. doi:org/10.1111/j.1600-  
785 065X.2008.00734.x
- 786 17. Vajjhala PR, Mirams RE, Hill JM. Multiple binding sites on the pyrin domain of ASC protein  
787 allow self-association and interaction with NLRP3 protein. *Journal of Biological Chemistry*.  
788 2012;287(50):41732-43. doi:10.1074/jbc.M112.381228
- 789 18. de Zoete MR, Palm NW, Zhu S, Flavell RA. Inflammasomes. *Cold Spring Harbor*  
790 *perspectives in biology*. 2014;6(12):a016287. doi:10.1101/cshperspect.a016287
- 791 19. Mamantopoulos M, Ronchi F, Van Hauwermeiren F, Vieira-Silva S, Yilmaz B, Martens L, et  
792 al. Nlrp6-and ASC-dependent inflammasomes do not shape the commensal gut microbiota  
793 composition. *Immunity*. 2017;47(2):339-48. e4. doi:org/10.1016/j.immuni.2017.07.011
- 794 20. WHO I. World malaria report 2017. Geneva: World Health Organization. 2021.
- 795 21. Bauernfeind FG, Horvath G, Stutz A, Alnemri ES, MacDonald K, Speert D, et al. Cutting  
796 edge: NF- $\kappa$ B activating pattern recognition and cytokine receptors license NLRP3 inflammasome  
797 activation by regulating NLRP3 expression. *The Journal of Immunology*. 2009;183(2):787-91.  
798 doi:org/10.4049/jimmunol.0901363
- 799 22. Liu T, Zhang L, Joo D, Sun S-C. NF- $\kappa$ B signaling in inflammation. *Signal transduction and*  
800 *targeted therapy*. 2017;2(1):1-9. doi:org/10.1038/sigtrans.2017.23
- 801 23. Francis SE, Sullivan DJ, Jr., Goldberg DE. Hemoglobin metabolism in the malaria parasite  
802 *Plasmodium falciparum*. *Annual review of microbiology*. 1997;51:97-123.  
803 doi:10.1146/annurev.micro.51.1.97
- 804 24. Ozaki E, Campbell M, Doyle SL. Targeting the NLRP3 inflammasome in chronic  
805 inflammatory diseases: current perspectives. *Journal of inflammation research*. 2015;8:15.  
806 doi:10.2147/JIR.S51250
- 807 25. Franchi L, Eigenbrod T, Muñoz-Planillo R, Ozkurede U, Kim Y-G, Chakrabarti A, et al.  
808 Cytosolic double-stranded RNA activates the NLRP3 inflammasome via MAVS-induced membrane

- 809 permeabilization and K<sup>+</sup> efflux. *The Journal of Immunology*. 2014;193(8):4214-22.  
810 doi:10.4049/jimmunol.1400582
- 811 26. Latz E, Xiao TS, Stutz A. Activation and regulation of the inflammasomes. *Nature Reviews*  
812 *Immunology*. 2013;13(6):397-411. doi:org/10.1038/nri3452
- 813 27. Jo E-K, Kim JK, Shin D-M, Sasakawa C. Molecular mechanisms regulating NLRP3  
814 inflammasome activation. *Cellular & molecular immunology*. 2016;13(2):148-59.  
815 doi:org/10.1038/cmi.2015.95
- 816 28. Kelley N, Jeltema D, Duan Y, He Y. The NLRP3 Inflammasome: An Overview of  
817 Mechanisms of Activation and Regulation. *International journal of molecular sciences*. 2019;20(13).  
818 doi:10.3390/ijms20133328
- 819 29. Kelley N, Jeltema D, Duan Y, He Y. The NLRP3 inflammasome: an overview of mechanisms  
820 of activation and regulation. *International journal of molecular sciences*. 2019;20(13):3328.
- 821 30. Martinon F, Burns K, Tschopp J. The inflammasome: a molecular platform triggering  
822 activation of inflammatory caspases and processing of proIL- $\beta$ . *Molecular cell*. 2002;10(2):417-26.  
823 doi:org/10.1016/S1097-2765(02)00599-3
- 824 31. Kayagaki N, Warming S, Lamkanfi M, Walle LV, Louie S, Dong J, et al. Non-canonical  
825 inflammasome activation targets caspase-11. *Nature*. 2011;479(7371):117-21.  
826 doi:org/10.1038/nature10558
- 827 32. Kayagaki N, Wong MT, Stowe IB, Ramani SR, Gonzalez LC, Akashi-Takamura S, et al.  
828 Noncanonical inflammasome activation by intracellular LPS independent of TLR4. *Science*.  
829 2013;341(6151):1246-9. doi:10.1126/science.1240248
- 830 33. Kim J-J, Jo E-K. NLRP3 inflammasome and host protection against bacterial infection.  
831 *Journal of Korean medical science*. 2013;28(10):1415-23. doi:10.3346/jkms.2013.28.10.1415
- 832 34. Clay GM, Sutterwala FS, Wilson ME. NLR proteins and parasitic disease. *Immunologic*  
833 *research*. 2014;59:142-52. doi:org/10.1007/s12026-014-8544-x
- 834 35. Florens L, Washburn MP, Raine JD, Anthony RM, Grainger M, Haynes JD, et al. A  
835 proteomic view of the *Plasmodium falciparum* life cycle. *Nature*. 2002;419(6906):520-6.  
836 doi:org/10.1038/nature01107
- 837 36. Garrido-Cardenas JA, González-Cerón L, Manzano-Agugliaro F, Mesa-Valle C. *Plasmodium*  
838 *genomics: an approach for learning about and ending human malaria*. *Parasitology research*.  
839 2019;118(1):1-27. doi:10.1007/s00436-018-6127-9



- 840 37. Rossi M, Fasel N. How to master the host immune system? Leishmania parasites have the  
841 solutions! *Int Immunol.* 2018;30(3):103-11. doi:10.1093/intimm/dxx075
- 842 38. Su X-Z, Lane KD, Xia L, Sá JM, Wellems TE. Plasmodium Genomics and Genetics: New  
843 Insights into Malaria Pathogenesis, Drug Resistance, Epidemiology, and Evolution. *Clin Microbiol*  
844 *Rev.* 2019;32(4):e00019-19. doi:10.1128/CMR.00019-19
- 845 39. Martiney JA, Sherry B, Metz CN, Espinoza M, Ferrer AS, Calandra T, et al. Macrophage  
846 migration inhibitory factor release by macrophages after ingestion of Plasmodium chabaudi-infected  
847 erythrocytes: possible role in the pathogenesis of malarial anemia. *Infection and Immunity.*  
848 2000;68(4):2259-67. doi:org/10.1128/iai.68.4.2259-2267.2000
- 849 40. Trampuz A, Jereb M, Muzlovic I, Prabhu RM. Clinical review: Severe malaria. *Critical Care.*  
850 2003;7(4):315. doi:10.1186/cc2183
- 851 41. Weidanz WP. Malaria and alterations in immune reactivity. *British medical bulletin.*  
852 1982;38(2):167-72. doi:10.1093/oxfordjournals.bmb.a071754
- 853 42. Deroost K, Pham T-T, Opdenakker G, Van den Steen PE. The immunological balance  
854 between host and parasite in malaria. *FEMS Microbiology Reviews.* 2015;40(2):208-57.  
855 doi:10.1093/femsre/fuv046
- 856 43. Ataide MA, Andrade WA, Zamboni DS, Wang D, Souza Mdo C, Franklin BS, et al. Malaria-  
857 induced NLRP12/NLRP3-dependent caspase-1 activation mediates inflammation and  
858 hypersensitivity to bacterial superinfection. *PLoS pathogens.* 2014;10(1):e1003885.  
859 doi:10.1371/journal.ppat.1003885
- 860 44. Deroost K, Pham T-T, Opdenakker G, Van den Steen PE. The immunological balance  
861 between host and parasite in malaria. *FEMS microbiology reviews.* 2016;40(2):208-57.
- 862 45. Gowda DC, Wu X. Parasite Recognition and Signaling Mechanisms in Innate Immune  
863 Responses to Malaria. *Frontiers in immunology.* 2018;9:3006-. doi:10.3389/fimmu.2018.03006
- 864 46. Kwiatkowski D, Sambou I, Twumasi P, Greenwood BM, Hill AVS, Manogue KR, et al. TNF  
865 concentration in fatal cerebral, non-fatal cerebral, and uncomplicated Plasmodium falciparum  
866 malaria. *The Lancet.* 1990;336(8725):1201-4. doi:org/10.1016/0140-6736(90)92827-5
- 867 47. Stuart KD, Weeks R, Guilbride L, Myler PJ. Molecular organization of Leishmania RNA virus  
868 1. *Proceedings of the National Academy of Sciences.* 1992;89(18):8596-600.  
869 doi:10.1073/pnas.89.18.8596

- 870 48. de Carvalho RVH, Lima-Junior DS, da Silva MVG, Dilucca M, Rodrigues TS, Horta CV, et al.  
871 Leishmania RNA virus exacerbates Leishmaniasis by subverting innate immunity via TLR3-mediated  
872 NLRP3 inflammasome inhibition. *Nature communications*. 2019;10(1):5273. doi:10.1038/s41467-  
873 019-13356-2
- 874 49. Shio MT, Eisenbarth SC, Savaria M, Vinet AF, Bellemare MJ, Harder KW, et al. Malarial  
875 hemozoin activates the NLRP3 inflammasome through Lyn and Syk kinases. *PLoS pathogens*.  
876 2009;5(8):e1000559. doi:10.1371/journal.ppat.1000559
- 877 50. Griffith JW, Sun T, McIntosh MT, Bucala R. Pure Hemozoin is inflammatory in vivo and  
878 activates the NALP3 inflammasome via release of uric acid. *Journal of immunology (Baltimore, Md :*  
879 *1950)*. 2009;183(8):5208-20. doi:10.4049/jimmunol.0713552
- 880 51. Velagapudi R, Kosoko AM, Olajide OA. Induction of Neuroinflammation and Neurotoxicity by  
881 Synthetic Hemozoin. *Cellular and molecular neurobiology*. 2019;39(8):1187-200.  
882 doi:10.1007/s10571-019-00713-4
- 883 52. Storm J, Craig AG. Pathogenesis of cerebral malaria--inflammation and cytoadherence.  
884 *Frontiers in cellular and infection microbiology*. 2014;4:100. doi:10.3389/fcimb.2014.00100
- 885 53. Dunst J, Kamena F, Matuschewski K. Cytokines and Chemokines in Cerebral Malaria  
886 Pathogenesis. *Frontiers in cellular and infection microbiology*. 2017;7:324-  
887 doi:10.3389/fcimb.2017.00324
- 888 54. Strangward P, Haley MJ, Albornoz MG, Barrington J, Shaw T, Dookie R, et al. Targeting the  
889 IL33-NLRP3 axis improves therapy for experimental cerebral malaria. *Proceedings of the National*  
890 *Academy of Sciences of the United States of America*. 2018;115(28):7404-9.  
891 doi:10.1073/pnas.1801737115
- 892 55. Pack AD, Schwartzhoff PV, Zacharias ZR, Fernandez-Ruiz D, Heath WR, Gurung P, et al.  
893 Hemozoin-mediated inflammasome activation limits long-lived anti-malarial immunity. *Cell reports*.  
894 2021;36(8):109586. doi:10.1016/j.celrep.2021.109586
- 895 56. Kalantari P, DeOliveira RB, Chan J, Corbett Y, Rathinam V, Stutz A, et al. Dual engagement  
896 of the NLRP3 and AIM2 inflammasomes by plasmodium-derived hemozoin and DNA during malaria.  
897 *Cell reports*. 2014;6(1):196-210. doi:10.1016/j.celrep.2013.12.014
- 898 57. Yu X, Du Y, Cai C, Cai B, Zhu M, Xing C, et al. Inflammasome activation negatively  
899 regulates MyD88-IRF7 type I IFN signaling and anti-malaria immunity. *Nature communications*.  
900 2018;9(1):4964. doi:10.1038/s41467-018-07384-7

- 901 58. Marty-Roix R, Vladimer GI, Pouliot K, Weng D, Buglione-Corbett R, West K, et al.  
902 Identification of QS-21 as an Inflammasome-activating Molecular Component of Saponin Adjuvants.  
903 *The Journal of biological chemistry*. 2016;291(3):1123-36. doi:10.1074/jbc.M115.683011
- 904 59. O'Neill LA, Golenbock D, Bowie AG. The history of Toll-like receptors—redefining innate  
905 immunity. *Nature Reviews Immunology*. 2013;13(6):453-60. doi:org/10.1038/nri3446
- 906 60. Vera-Izaguirre DS, Vega-Memije E, Quintanilla-Cedillo MR, Arenas R. Leishmaniasis. A  
907 review. *Dermatología Cosmética, Médica Y Quirúrgica*. 2006;4(4):252-60.  
908 doi:10.12688/f1000research.11120.1
- 909 61. Gorfu G, Cirelli KM, Melo MB, Mayer-Barber K, Crown D, Koller BH, et al. Dual role for  
910 inflammasome sensors NLRP1 and NLRP3 in murine resistance to *Toxoplasma gondii*. *mBio*.  
911 2014;5(1). doi:10.1128/mBio.01117-13
- 912 62. Chappuis F, Sundar S, Hailu A, Ghalib H, Rijal S, Peeling RW, et al. Visceral leishmaniasis:  
913 what are the needs for diagnosis, treatment and control? *Nature reviews microbiology*.  
914 2007;5(11):873-82. doi:org/10.1038/nrmicro1748
- 915 63. Desjeux P. Leishmaniasis: current situation and new perspectives. *Comparative*  
916 *Immunology, Microbiology and Infectious Diseases*. 2004;27(5):305-18.  
917 doi:org/10.1016/j.cimid.2004.03.004
- 918 64. Zhu L, Qi W, Yang G, Yang Y, Wang Y, Zheng L, et al. *Toxoplasma gondii* Rhoptry Protein 7  
919 (ROP7) Interacts with NLRP3 and Promotes Inflammasome Hyperactivation in THP-1-Derived  
920 Macrophages. *Cells*. 2022;11(10). doi:10.3390/cells11101630
- 921 65. Becker I, Salaiza N, Aguirre M, Delgado J, Carrillo-Carrasco N, Kobeh LG, et al. Leishmania  
922 lipophosphoglycan (LPG) activates NK cells through toll-like receptor-2. *Molecular and biochemical*  
923 *parasitology*. 2003;130(2):65-74. doi:org/10.1016/S0166-6851(03)00160-9
- 924 66. Elmahallawy EK, Alkhaldi AAM, Saleh AA. Host immune response against leishmaniasis  
925 and parasite persistence strategies: A review and assessment of recent research. *Biomedicine &*  
926 *Pharmacotherapy*. 2021;139:111671. doi:org/10.1016/j.biopha.2021.111671
- 927 67. Andargie TE, Ejara ED. Pro-and anti-inflammatory cytokines in visceral leishmaniasis.  
928 *Journal of Cell Science & Therapy*. 2015;6(2):1. doi:org/10.1080/20477724.2016.1232042
- 929 68. Voronov E, Dotan S, Gayvoronsky L, White RM, Cohen I, Krelin Y, et al. IL-1-induced  
930 inflammation promotes development of leishmaniasis in susceptible BALB/c mice. *Int Immunol*.  
931 2010;22(4):245-57. doi:10.1093/intimm/dxq006

- 932 69. Gurung P, Lukens JR, Kanneganti TD. Mitochondria: diversity in the regulation of the  
933 NLRP3 inflammasome. *Trends in molecular medicine*. 2015;21(3):193-201.  
934 doi:10.1016/j.molmed.2014.11.008
- 935 70. Lima-Junior DS, Costa DL, Carregaro V, Cunha LD, Silva AL, Mineo TW, et al.  
936 Inflammasome-derived IL-1 $\beta$  production induces nitric oxide-mediated resistance to *Leishmania*.  
937 *Nature medicine*. 2013;19(7):909-15. doi:org/10.1038/nm.3221
- 938 71. Moreira RB, Pirmez C, de Oliveira-Neto MP, Aguiar LS, Gonçalves AJS, Pereira LOR, et al.  
939 AIM2 inflammasome is associated with disease severity in tegumentary leishmaniasis caused by  
940 *Leishmania (V.) braziliensis*. *Parasite immunology*. 2017;39(7). doi:10.1111/pim.12435
- 941 72. Charmoy M, Hurrell BP, Romano A, Lee SH, Ribeiro-Gomes F, Riteau N, et al. The Nlrp3  
942 inflammasome, IL-1 $\beta$ , and neutrophil recruitment are required for susceptibility to a nonhealing strain  
943 of *Leishmania major* in C57BL/6 mice. *European journal of immunology*. 2016;46(4):897-911.  
944 doi:10.1002/eji.201546015
- 945 73. Gurung P, Karki R, Vogel P, Watanabe M, Bix M, Lamkanfi M, et al. An NLRP3  
946 inflammasome-triggered Th2-biased adaptive immune response promotes leishmaniasis. *The*  
947 *Journal of clinical investigation*. 2015;125(3):1329-38. doi:org/10.1172/JCI79526.
- 948 74. Gurung P, Karki R, Vogel P, Watanabe M, Bix M, Lamkanfi M, et al. An NLRP3  
949 inflammasome-triggered Th2-biased adaptive immune response promotes leishmaniasis. *J Clin*  
950 *Invest*. 2015;125(3):1329-38. doi:10.1172/jci79526
- 951 75. Lima-Junior DS, Mineo TWP, Calich VLG, Zamboni DS. Dectin-1 Activation during  
952 *Leishmania amazonensis* Phagocytosis Prompts Syk-Dependent Reactive Oxygen Species  
953 Production To Trigger Inflammasome Assembly and Restriction of Parasite Replication. *Journal of*  
954 *immunology (Baltimore, Md : 1950)*. 2017;199(6):2055-68. doi:10.4049/jimmunol.1700258
- 955 76. Chaves MM, Sinflorio DA, Thorstenberg ML, Martins MDA, Moreira-Souza ACA, Rangel TP,  
956 et al. Non-canonical NLRP3 inflammasome activation and IL-1 $\beta$  signaling are necessary to *L.*  
957 *amazonensis* control mediated by P2X7 receptor and leukotriene B4. *PLoS pathogens*.  
958 2019;15(6):e1007887. doi:10.1371/journal.ppat.1007887
- 959 77. Gupta G, Santana AKM, Gomes CM, Turatti A, Milanezi CM, Bueno Filho R, et al.  
960 Inflammasome gene expression is associated with immunopathology in human localized cutaneous  
961 leishmaniasis. *Cellular immunology*. 2019;341:103920. doi:10.1016/j.cellimm.2019.04.008
- 962 78. de Carvalho RVH, Andrade WA, Lima-Junior DS, Dilucca M, de Oliveira CV, Wang K, et al.  
963 *Leishmania* Lipophosphoglycan Triggers Caspase-11 and the Non-canonical Activation of the  
964 NLRP3 Inflammasome. *Cell reports*. 2019;26(2):429-37.e5. doi:10.1016/j.celrep.2018.12.047

- 965 79. Shio MT, Christian JG, Jung JY, Chang KP, Olivier M. PKC/ROS-Mediated NLRP3  
966 Inflammasome Activation Is Attenuated by Leishmania Zinc-Metalloprotease during Infection. *PLoS*  
967 *neglected tropical diseases*. 2015;9(6):e0003868. doi:10.1371/journal.pntd.0003868
- 968 80. Gupta AK, Ghosh K, Palit S, Barua J, Das PK, Ukil A. Leishmania donovani inhibits  
969 inflammasome-dependent macrophage activation by exploiting the negative regulatory proteins A20  
970 and UCP2. *FASEB journal : official publication of the Federation of American Societies for*  
971 *Experimental Biology*. 2017;31(11):5087-101. doi:10.1096/fj.201700407R
- 972 81. de Carvalho RVH, Lima-Júnior DS, de Oliveira CV, Zamboni DS. Endosymbiotic RNA virus  
973 inhibits Leishmania-induced caspase-11 activation. *iScience*. 2021;24(1):102004.  
974 doi:10.1016/j.isci.2020.102004
- 975 82. Innes E. A brief history and overview of *Toxoplasma gondii*. *Zoonoses and public health*.  
976 2010;57(1):1-7. doi:org/10.1111/j.1863-2378.2009.01276.x
- 977 83. Halonen SK, Weiss LM. Toxoplasmosis. *Handbook of clinical neurology*. 2013;114:125-45.  
978 doi:10.1016/b978-0-444-53490-3.00008-x
- 979 84. Weiss LM, Dubey JP. Toxoplasmosis: A history of clinical observations. *International journal*  
980 *for parasitology*. 2009;39(8):895-901. doi:10.1016/j.ijpara.2009.02.004
- 981 85. Tait ED, Hunter CA. Advances in understanding immunity to *Toxoplasma gondii*. *Memorias*  
982 *do Instituto Oswaldo Cruz*. 2009;104:201-10. doi:10.1590/S0074-02762009000200013
- 983 86. Braun L, Brenier-Pinchart M-P, Yogavel M, Curt-Varesano A, Curt-Bertini R-L, Hussain T, et  
984 al. A *Toxoplasma dense granule* protein, GRA24, modulates the early immune response to infection  
985 by promoting a direct and sustained host p38 MAPK activation. *Journal of Experimental Medicine*.  
986 2013;210(10):2071-86. doi:org/10.1084/jem.20130103
- 987 87. Ahmed N, French T, Rausch S, Kühl A, Hemminger K, Dunay IR, et al. *Toxoplasma co-*  
988 *infection prevents Th2 differentiation and leads to a helminth-specific Th1 response*. *Frontiers in*  
989 *cellular and infection microbiology*. 2017;7:341. doi:org/10.3389/fcimb.2017.00341
- 990 88. Oksanen A, Aittomäki S, Jankovic D, Ortutay Z, Pulkkinen K, Hämäläinen S, et al.  
991 Proprotein convertase *FURIN* constrains Th2 differentiation and is critical for host resistance against  
992 *Toxoplasma gondii*. *The Journal of Immunology*. 2014;193(11):5470-9.  
993 doi:org/10.4049/jimmunol.1401629
- 994 89. Zamboni DS, Lima-Junior DS. Inflammasomes in host response to protozoan parasites.  
995 *Immunological reviews*. 2015;265(1):156-71. doi:10.1111/imr.12291

- 996 90. Quan J-H, Huang R, Wang Z, Huang S, Choi I-W, Zhou Y, et al. P2X7 receptor mediates  
 997 NLRP3-dependent IL-1 $\beta$  secretion and parasite proliferation in *Toxoplasma gondii*-infected human  
 998 small intestinal epithelial cells. *Parasites & Vectors*. 2018;11(1):1. doi:10.1186/s13071-017-2573-y
- 999 91. Moreira-Souza ACA, Almeida-da-Silva CLC, Rangel TP, Rocha GDC, Bellio M, Zamboni  
 1000 DS, et al. The P2X7 Receptor Mediates *Toxoplasma gondii* Control in Macrophages through  
 1001 Canonical NLRP3 Inflammasome Activation and Reactive Oxygen Species Production. *Front*  
 1002 *Immunol*. 2017;8:1257. doi:10.3389/fimmu.2017.01257
- 1003 92. Gov L, Schneider CA, Lima TS, Pandori W, Lodoen MB. NLRP3 and Potassium Efflux Drive  
 1004 Rapid IL-1 $\beta$  Release from Primary Human Monocytes during *Toxoplasma gondii* Infection. *Journal of*  
 1005 *immunology* (Baltimore, Md : 1950). 2017;199(8):2855-64. doi:10.4049/jimmunol.1700245
- 1006 93. Pandori WJ, Lima TS, Mallya S, Kao TH, Gov L, Lodoen MB. *Toxoplasma gondii* activates a  
 1007 Syk-CARD9-NF- $\kappa$ B signaling axis and gasdermin D-independent release of IL-1 $\beta$  during infection of  
 1008 primary human monocytes. *PLoS pathogens*. 2019;15(8):e1007923.  
 1009 doi:10.1371/journal.ppat.1007923
- 1010 94. Pazoki H, Mohammad Rahimi H, Mirjalali H, Niyati M, Mosaffa N, Seyed Tabaei SJ, et al.  
 1011 Soluble total antigen derived from *Toxoplasma gondii* tachyzoites increased the expression levels of  
 1012 NLRP1, NLRP3, NLRC4, AIM2, and the release of mature form of IL1 $\beta$ , but downregulated the  
 1013 expression of IL1 $\beta$  and IL18 genes in THP-1 cell line. *Microbial pathogenesis*. 2021;158:105072.  
 1014 doi:10.1016/j.micpath.2021.105072
- 1015 95. Pazoki H, Mirjalali H, Niyati M, Seyed Tabaei SJ, Mosaffa N, Shahrokh S, et al.  
 1016 *Toxoplasma gondii* profilin induces NLRP3 activation and IL-1 $\beta$  production/secretion in THP-1 cells.  
 1017 *Microbial pathogenesis*. 2023;180:106120. doi:10.1016/j.micpath.2023.106120
- 1018 96. Kim JS, Mun SJ, Cho E, Kim D, Son W, Jeon HI, et al. *Toxoplasma gondii* GRA9 Regulates  
 1019 the Activation of NLRP3 Inflammasome to Exert Anti-Septic Effects in Mice. *International journal of*  
 1020 *molecular sciences*. 2020;21(22). doi:10.3390/ijms21228437
- 1021 97. Bando H, Lee Y, Sakaguchi N, Pradipta A, Ma JS, Tanaka S, et al. Inducible Nitric Oxide  
 1022 Synthase Is a Key Host Factor for *Toxoplasma* GRA15-Dependent Disruption of the Gamma  
 1023 Interferon-Induced Antiparasitic Human Response. *mBio*. 2018;9(5). doi:10.1128/mBio.01738-18
- 1024 98. Wang Y, Cirelli KM, Barros PDC, Sangaré LO, Butty V, Hassan MA, et al. Three  
 1025 *Toxoplasma gondii* Dense Granule Proteins Are Required for Induction of Lewis Rat Macrophage  
 1026 Pyroptosis. *mBio*. 2019;10(1). doi:10.1128/mBio.02388-18
- 1027 99. Stanley SL. Amoebiasis. *The lancet*. 2003;361(9362):1025-34. doi:10.1016/S0140-  
 1028 6736(03)12830-9

- 1029 100. Organization WH. The World Health Report 1998: Life in the 21st century a vision for all.  
1030 The world health report 1998: life in the 21st century A vision for all, 1998. p. 241-.
- 1031 101. Guillén N. Pathogenicity and virulence of *Entamoeba histolytica*, the agent of amoebiasis.  
1032 Virulence. 2023;14(1):2158656. doi:10.1080/21505594.2022.2158656
- 1033 102. Haque R, Huston CD, Hughes M, Houpt E, Petri Jr WA. Amebiasis. New England journal of  
1034 medicine. 2003;348(16):1565-73. doi:10.1056/NEJMra022710
- 1035 103. Chou A, Austin RL. *Entamoeba histolytica* Infection. StatPearls: StatPearls Publishing  
1036 Copyright © 2023, StatPearls Publishing LLC.; 2023.
- 1037 104. Carrero JC, Reyes-López M, Serrano-Luna J, Shibayama M, Unzueta J, León-Sicairos N, et  
1038 al. Intestinal amoebiasis: 160 years of its first detection and still remains as a health problem in  
1039 developing countries. International Journal of Medical Microbiology. 2020;310(1):151358.  
1040 doi:org/10.1016/j.ijmm.2019.151358
- 1041 105. Uribe-Querol E, Rosales C. Immune Response to the Enteric Parasite *Entamoeba*  
1042 *histolytica*. Physiology. 2020;35(4):244-60. doi:10.1152/physiol.00038.2019
- 1043 106. Kantor M, Abrantes A, Estevez A, Schiller A, Torrent J, Gascon J, et al. *Entamoeba*  
1044 *histolytica*: updates in clinical manifestation, pathogenesis, and vaccine development. Canadian  
1045 Journal of Gastroenterology and Hepatology. 2018;2018. doi:org/10.1155/2018/4601420
- 1046 107. Galván-Moroyoqui JM, del Carmen Domínguez-Robles M, Meza I. Pathogenic bacteria  
1047 prime the induction of Toll-like receptor signalling in human colonic cells by the Gal/GalNAc lectin  
1048 Carbohydrate Recognition Domain of *Entamoeba histolytica*. International Journal for Parasitology.  
1049 2011;41(10):1101-12. doi:10.1016/j.ijpara.2011.06.003
- 1050 108. Sharma M, Bhasin D, Vohra H. Differential induction of immunoregulatory circuits of  
1051 phagocytic cells by Gal/Gal NAc lectin from pathogenic and nonpathogenic *Entamoeba*. Journal of  
1052 Clinical Immunology. 2008;28:542-57. doi:org/10.1007/s10875-008-9184-5
- 1053 109. Ngobeni R, Abhyankar MM, Jiang NM, Farr LA, Samie A, Haque R, et al. *Entamoeba*  
1054 *histolytica*-encoded homolog of macrophage migration inhibitory factor contributes to mucosal  
1055 inflammation during amebic colitis. The Journal of infectious diseases. 2017;215(8):1294-302.  
1056 doi:org/10.1093/infdis/jix076
- 1057 110. St-Pierre J, Moreau F, Cornick S, Quach J, Begum S, Aracely Fernandez L, et al. The  
1058 macrophage cytoskeleton acts as a contact sensor upon interaction with *Entamoeba histolytica* to

- 1059 trigger IL-1 $\beta$  secretion. PLoS pathogens. 2017;13(8):e1006592. doi:10.1128/iai.69.5.3382-  
1060 3388.2001
- 1061 111. Quach J, Moreau F, Sandall C, Chadee K. Entamoeba histolytica-induced IL-1 $\beta$  secretion is  
1062 dependent on caspase-4 and gasdermin D. Mucosal immunology. 2019;12(2):323-39.  
1063 doi:org/10.1038/s41385-018-0101-9
- 1064 112. Maldonado-Bernal C, Kirschning C, Rosenstein Y, Rocha L, Rios-Sarabia N, Espinosa-  
1065 Cantellano M, et al. The innate immune response to Entamoeba histolytica  
1066 lipopeptidophosphoglycan is mediated by toll-like receptors 2 and 4. Parasite immunology.  
1067 2005;27(4):127-37. doi:org/10.1111/j.1365-3024.2005.00754.x
- 1068 113. Dey I, Chadee K. Prostaglandin E2 produced by Entamoeba histolytica binds to EP4  
1069 receptors and stimulates interleukin-8 production in human colonic cells. Infection and Immunity.  
1070 2008;76(11):5158-63. doi:org/10.1128/iai.00645-08
- 1071 114. Peterson KM, Shu J, Duggal P, Haque R, Mondal D, Petri Jr WA. Association between TNF-  
1072  $\alpha$  and Entamoeba histolytica diarrhea. The American journal of tropical medicine and hygiene.  
1073 2010;82(4):620. doi:10.4269/ajtmh.2010.09-0493
- 1074 115. Haque R, Mondal D, Shu J, Roy S, Kabir M, Davis AN, et al. Correlation of interferon-  
1075 gamma production by peripheral blood mononuclear cells with childhood malnutrition and  
1076 susceptibility to amebiasis. Am J Trop Med Hyg. 2007;76(2):340-4. doi:10.4269/ajtmh.2007.76.340
- 1077 116. Houghton ER, Glembocki DJ, Obrig TG, Moskaluk CA, Lockhart LA, Wright RL, et al. The  
1078 mouse model of amebic colitis reveals mouse strain susceptibility to infection and exacerbation of  
1079 disease by CD4+ T cells. The Journal of Immunology. 2002;169(8):4496-503.  
1080 doi:org/10.4049/jimmunol.169.8.4496
- 1081 117. Rafiei A, Ajami A, Hajilooi M, Etemadi A. Th-1/Th-2 cytokine pattern in human amoebic  
1082 colitis. Pakistan journal of biological sciences: PJBS. 2009;12(20):1376-80.  
1083 doi:org/10.3923/pjbs.2009.1376.1380
- 1084 118. Guo X, Stroup S, Houghton E. Persistence of Entamoeba histolytica infection in CBA mice owes  
1085 to intestinal IL-4 production and inhibition of protective IFN- $\gamma$ . Mucosal immunology. 2008;1(2):139-  
1086 46. doi:org/10.1038/mi.2007.18
- 1087 119. Hamano S, Asgharpour A, Stroup SE, Wynn TA, Leiter EH, Houghton E. Resistance of C57BL/6  
1088 mice to amoebiasis is mediated by nonhemopoietic cells but requires hemopoietic IL-10 production.  
1089 The Journal of Immunology. 2006;177(2):1208-13. doi:org/10.4049/jimmunol.177.2.1208



- 1090 120. Guo X, Barroso L, Lyster DM, Petri Jr WA, Houpt ER. CD4+ and CD8+ T cell-and IL-17-  
 1091 mediated protection against *Entamoeba histolytica* induced by a recombinant vaccine. *Vaccine*.  
 1092 2011;29(4):772-7. doi:org/10.1016/j.vaccine.2010.11.013
- 1093 121. Mortimer L, Moreau F, Cornick S, Chadee K. The NLRP3 inflammasome is a pathogen  
 1094 sensor for invasive *Entamoeba histolytica* via activation of  $\alpha 5\beta 1$  integrin at the macrophage-amebae  
 1095 intercellular junction. *PLoS pathogens*. 2015;11(5):e1004887. doi:org/10.1371/journal.ppat.1004887
- 1096 122. Mortimer L, Moreau F, Cornick S, Chadee K. Gal-lectin-dependent contact activates the  
 1097 inflammasome by invasive *Entamoeba histolytica*. *Mucosal immunology*. 2014;7(4):829-41.  
 1098 doi:org/10.1038/mi.2013.100
- 1099 123. Bergsbaken T, Fink SL, Cookson BT. Pyroptosis: host cell death and inflammation. *Nature*  
 1100 *Reviews Microbiology*. 2009;7(2):99-109. doi:org/10.1038/nrmicro2070
- 1101 124. Begum S, Gorman H, Chadha A, Chadee K. Role of inflammasomes in innate host defense  
 1102 against *Entamoeba histolytica*. *Journal of Leucocyte Biology*. 2020;108(3):801-12.  
 1103 doi:org/10.1002/JLB.3MR0420-465R
- 1104 125. Martinon F, Mayor A, Tschopp J. The inflammasomes: guardians of the body. *Annual review*  
 1105 *of immunology*. 2009;27:229-65. doi:org/10.1146/annurev.immunol.021908.132715
- 1106 126. Conos SA, Lawlor K, Vaux D, Vince JE, Lindqvist L. Cell death is not essential for caspase-  
 1107 1-mediated interleukin-1 $\beta$  activation and secretion. *Cell Death & Differentiation*. 2016;23(11):1827-  
 1108 38. doi:org/10.1038/cdd.2016.69
- 1109 127. Marie C, Verkerke HP, Theodorescu D, Petri WA. A whole-genome RNAi screen uncovers a  
 1110 novel role for human potassium channels in cell killing by the parasite *Entamoeba histolytica*.  
 1111 *Scientific reports*. 2015;5(1):13613. doi:org/10.1038/srep13613
- 1112 128. Li X, Feng M, Zhao Y, Zhang Y, Zhou R, Zhou H, et al. A Novel TLR4-Binding Domain of  
 1113 Peroxiredoxin From *Entamoeba histolytica* Triggers NLRP3 Inflammasome Activation in  
 1114 Macrophages. *Front Immunol*. 2021;12:758451. doi:10.3389/fimmu.2021.758451
- 1115 129. Tasken K, Aandahl EM. Localized effects of cAMP mediated by distinct routes of protein  
 1116 kinase A. *Physiological reviews*. 2004;84(1):137-67. doi:10.1152/physrev.00021.2003
- 1117 130. Duncan JA, Bergstralh DT, Wang Y, Willingham SB, Ye Z, Zimmermann AG, et al.  
 1118 Cryopyrin/NALP3 binds ATP/dATP, is an ATPase, and requires ATP binding to mediate  
 1119 inflammatory signaling. *Proceedings of the National Academy of Sciences*. 2007;104(19):8041-6.  
 1120 doi:org/10.1073/pnas.0611496104

- 1121 131. El-Sayed NM, Myler PJ, Bartholomeu DC, Nilsson D, Aggarwal G, Tran A-N, et al. The  
1122 genome sequence of *Trypanosoma cruzi*, etiologic agent of Chagas disease. *Science*.  
1123 2005;309(5733):409-15. doi:10.1126/science.1112631
- 1124 132. OMS, Organization WH. Chagas disease in Latin America: an  
1125 epidemiological update based on 2010 estimates. *Weekly Epidemiological Record= Relevé*  
1126 *épidémiologique hebdomadaire*. 2015;90(06):33-44.
- 1127 133. Coura JR, Viñas PA. Chagas disease: a new worldwide challenge. *Nature*.  
1128 2010;465(7301):S6-S7. doi:org/10.1038/nature09221
- 1129 134. Anderson RM, May RM. *Infectious diseases of humans: dynamics and control*: Oxford  
1130 university press; 1992.
- 1131 135. Rassi Jr A, Rassi A, Marin-Neto JA. Chagas disease. *The Lancet*. 2010;375(9723):1388-  
1132 402. doi:org/10.1016/S0140-6736(10)60061-X
- 1133 136. Zingales B. *Trypanosoma cruzi* genetic diversity: Something new for something known  
1134 about Chagas disease manifestations, serodiagnosis and drug sensitivity. *Acta tropica*. 2018;184:38-  
1135 52. doi:10.1016/j.actatropica.2017.09.017
- 1136 137. Acquatella H. Echocardiography in Chagas heart disease. *Circulation*. 2007;115(9):1124-31.  
1137 doi:org/10.1161/CIRCULATIONAHA.106.627323
- 1138 138. Acevedo G, Girard M, Gomez K. The unsolved jigsaw puzzle of the immune response in  
1139 Chagas disease. *Front Immunol*. 2018;org/10.3389/fimmu.2018.01929.  
1140 doi:org/10.3389/fimmu.2018.01929
- 1141 139. Abrahamsohn IA, Coffman RL. *Trypanosoma cruzi*:IL-10, TNF, IFN- $\gamma$ , and IL-12 Regulate  
1142 Innate and Acquired Immunity to Infection. *Experimental Parasitology*. 1996;84(2):231-44.  
1143 doi:org/10.1006/expr.1996.0109
- 1144 140. Queiroga TBD, Pereira NdS, Silva DDd, Andrade CdM, Araújo Júnior RFd, Brito CRdN, et  
1145 al. Virulence of *Trypanosoma cruzi* Strains Is Related to the Differential Expression of Innate  
1146 Immune Receptors in the Heart. *Frontiers in cellular and infection microbiology*. 2021;11.  
1147 doi:10.3389/fcimb.2021.696719
- 1148 141. Queiroga TBD, Pereira NS, da Silva DD, Andrade CM, de Araújo Júnior RF, Brito C, et al.  
1149 Virulence of *Trypanosoma cruzi* Strains Is Related to the Differential Expression of Innate Immune  
1150 Receptors in the Heart. *Frontiers in cellular and infection microbiology*. 2021;11:696719.  
1151 doi:10.3389/fcimb.2021.696719

- 1152 142. Gonçalves VM, Matteucci KC, Buzzo CL, Miollo BH, Ferrante D, Torrecilhas AC, et al.  
1153 NLRP3 controls *Trypanosoma cruzi* infection through a caspase-1-dependent IL-1R-independent  
1154 NO production. *PLoS neglected tropical diseases*. 2013;7(10):e2469.  
1155 doi:10.1371/journal.pntd.0002469
- 1156 143. Pacheco AL, Vicentini G, Matteucci KC, Ribeiro RR, Weinlich R, Bortoluci KR. The  
1157 impairment in the NLRP3-induced NO secretion renders astrocytes highly permissive to *T. cruzi*  
1158 replication. *Journal of leukocyte biology*. 2019;106(1):201-7. doi:10.1002/jlb.4ab1118-416rr
- 1159 144. Silva GK, Costa RS, Silveira TN, Caetano BC, Horta CV, Gutierrez FR, et al. Apoptosis-  
1160 associated speck-like protein containing a caspase recruitment domain inflammasomes mediate IL-  
1161 1 $\beta$  response and host resistance to *Trypanosoma cruzi* infection. *Journal of immunology* (Baltimore,  
1162 Md : 1950). 2013;191(6):3373-83. doi:10.4049/jimmunol.1203293
- 1163 145. Dey N, Sinha M, Gupta S, Gonzalez MN, Fang R, Endsley JJ, et al. Caspase-1/ASC  
1164 inflammasome-mediated activation of IL-1 $\beta$ -ROS-NF- $\kappa$ B pathway for control of *Trypanosoma cruzi*  
1165 replication and survival is dispensable in NLRP3-/- macrophages. *PloS one*. 2014;9(11):e111539.  
1166 doi:10.1371/journal.pone.0111539
- 1167 146. Huante MB, Gupta S, Calderon VC, Koo SJ, Sinha M, Luxon BA, et al. Differential  
1168 inflammasome activation signatures following intracellular infection of human macrophages with  
1169 *Mycobacterium bovis* BCG or *Trypanosoma cruzi*. *Tuberculosis* (Edinburgh, Scotland).  
1170 2016;101s:S35-s44. doi:10.1016/j.tube.2016.09.026
- 1171 147. Rojas Márquez JD, Ana Y, Baigorri RE, Stempin CC, Cerban FM. Mammalian Target of  
1172 Rapamycin Inhibition in *Trypanosoma cruzi*-Infected Macrophages Leads to an Intracellular Profile  
1173 That Is Detrimental for Infection. *Front Immunol*. 2018;9:313. doi:10.3389/fimmu.2018.00313
- 1174 148. Rodriguez T, Pacheco-Fernández T, Vázquez-Mendoza A, Nieto-Yañez O, Juárez-Avelar I,  
1175 Reyes JL, et al. MGL1 Receptor Plays a Key Role in the Control of *T. cruzi* Infection by Increasing  
1176 Macrophage Activation through Modulation of ERK1/2, c-Jun, NF- $\kappa$ B and NLRP3 Pathways. *Cells*.  
1177 2020;9(1). doi:10.3390/cells9010108
- 1178 149. Paroli AF, Gonzalez PV, Díaz-Luján C, Onofrio LI, Arocena A, Cano RC, et al. NLRP3  
1179 Inflammasome and Caspase-1/11 Pathway Orchestrate Different Outcomes in the Host Protection  
1180 Against *Trypanosoma cruzi* Acute Infection. *Front Immunol*. 2018;9:913.  
1181 doi:10.3389/fimmu.2018.00913
- 1182 150. O'Dempsey T. CHAPTER 64 - Helminthic infections. In: Finch RG, Greenwood D, Norrby  
1183 SR, Whitley RJ, editors. *Antibiotic and Chemotherapy* (Ninth Edition);org/10.1016/B978-0-7020-  
1184 4064-1.00064-6. London: W.B. Saunders; 2010. p. 842-59. doi:org/10.1016/B978-0-7020-4064-  
1185 1.00064-6

- 1186 151. Jourdan PM, Lamberton PHL, Fenwick A, Addiss DG. Soil-transmitted helminth infections.  
1187 Lancet (London, England). 2018;391(10117):252-65. doi:10.1016/s0140-6736(17)31930-x
- 1188 152. McSorley HJ, Maizels RM. Helminth infections and host immune regulation. Clin Microbiol  
1189 Rev. 2012;25(4):585-608. doi:10.1128/cmr.05040-11
- 1190 153. Elliott DE, Summers RW, Weinstock JV. Helminths as governors of immune-mediated  
1191 inflammation. International journal for parasitology. 2007;37(5):457-64.  
1192 doi:org/10.1016/j.ijpara.2006.12.009
- 1193 154. Allen JE, Maizels RM. Diversity and dialogue in immunity to helminths. Nature Reviews  
1194 Immunology. 2011;11(6):375-88. doi:org/10.1038/nri2992
- 1195 155. Anthony RM, Rutitzky LI, Urban JF, Stadecker MJ, Gause WC. Protective immune  
1196 mechanisms in helminth infection. Nature Reviews Immunology. 2007;7(12):975-87.  
1197 doi:org/10.1038/nri2199
- 1198 156. Mahanty S, Mollis SN, Ravichandran M, Abrams JS, Kumaraswami V, Jayaraman K, et al.  
1199 High levels of spontaneous and parasite antigen-driven interleukin-10 production are associated with  
1200 antigen-specific hyporesponsiveness in human lymphatic filariasis. Journal of Infectious Diseases.  
1201 1996;173(3):769-72. doi:org/10.1093/infdis/173.3.769
- 1202 157. Steel C, Nutman TB. CTLA-4 in filarial infections: implications for a role in diminished T cell  
1203 reactivity. The Journal of Immunology. 2003;170(4):1930-8. doi:10.4049/jimmunol.170.4.1930
- 1204 158. Sartono E, Kruize YC, Kurniawan A, Maizels RM, Yazdanbakhsh M. Depression of antigen-  
1205 specific interleukin-5 and interferon- $\gamma$  responses in human lymphatic filariasis as a function of clinical  
1206 status and age. Journal of Infectious Diseases. 1997;175(5):1276-80. doi:org/10.1086/593701
- 1207 159. Babu S, Bhat SQ, Pavan Kumar N, Lipira AB, Kumar S, Karthik C, et al. Filarial lymphedema  
1208 is characterized by antigen-specific Th1 and Th17 proinflammatory responses and a lack of  
1209 regulatory T cells. PLoS neglected tropical diseases. 2009;3(4):e420.  
1210 doi:org/10.1371/journal.pntd.0000420
- 1211 160. Ritter M, Gross O, Kays S, Ruland J, Nimmerjahn F, Saijo S, et al. Schistosoma mansoni  
1212 triggers Dectin-2, which activates the Nlrp3 inflammasome and alters adaptive immune responses.  
1213 Proceedings of the National Academy of Sciences. 2010;107(47):20459-64.  
1214 doi:org/10.1073/pnas.1010337107
- 1215 161. Celas DP, Motrán CC, Cervi L. Helminths Turning on the NLRP3 Inflammasome: Pros and  
1216 Cons. Trends in Parasitology. 2020;36(2):87-90. doi:org/10.1016/j.pt.2019.10.012

- 1217 162. Ritter M, Gross O, Kays S, Ruland J, Nimmerjahn F, Saijo S, et al. *Schistosoma mansoni*  
1218 triggers Dectin-2, which activates the Nlrp3 inflammasome and alters adaptive immune responses.  
1219 Proceedings of the National Academy of Sciences of the United States of America.  
1220 2010;107(47):20459-64. doi:10.1073/pnas.1010337107
- 1221 163. Meng N, Xia M, Lu YQ, Wang M, Boini KM, Li PL, et al. Activation of NLRP3 inflammasomes  
1222 in mouse hepatic stellate cells during *Schistosoma J.* infection. *Oncotarget.* 2016;7(26):39316-31.  
1223 doi:10.18632/oncotarget.10044
- 1224 164. Yu Y-R, Ni X-Q, Huang J, Zhu Y-H, Qi Y-F. Taurine drinking ameliorates hepatic granuloma  
1225 and fibrosis in mice infected with *Schistosoma japonicum*. *International Journal for Parasitology:*  
1226 *Drugs and Drug Resistance.* 2016;6(1):35-43. doi:10.1016/j.ijpddr.2016.01.003
- 1227 165. Liu X, Zhang YR, Cai C, Ni XQ, Zhu Q, Ren JL, et al. Taurine Alleviates *Schistosoma*-  
1228 Induced Liver Injury by Inhibiting the TXNIP/NLRP3 Inflammasome Signal Pathway and Pyroptosis.  
1229 *Infect Immun.* 2019;87(12). doi:10.1128/iai.00732-19
- 1230 166. Celas DP, Corvo I, Silvano L, Tort JF, Chiapello LS, Fresno M, et al. Cathepsin L3 From  
1231 *Fasciola hepatica* Induces NLRP3 Inflammasome Alternative Activation in Murine Dendritic Cells.  
1232 *Front Immunol.* 2019;10:552. doi:10.3389/fimmu.2019.00552
- 1233 167. Alvarado R, To J, Lund ME, Pinar A, Mansell A, Robinson MW, et al. The immune  
1234 modulatory peptide FhHDM-1 secreted by the helminth *Fasciola hepatica* prevents NLRP3  
1235 inflammasome activation by inhibiting endolysosomal acidification in macrophages. *FASEB journal :*  
1236 *official publication of the Federation of American Societies for Experimental Biology.* 2017;31(1):85-  
1237 95. doi:10.1096/fj.201500093R
- 1238 168. Jin X, Bai X, Yang Y, Ding J, Shi H, Fu B, et al. NLRP3 played a role in *Trichinella spiralis*-  
1239 triggered Th2 and regulatory T cells response. *Veterinary research.* 2020;51(1):107.  
1240 doi:10.1186/s13567-020-00829-2
- 1241

**Figure 1: Mechanisms of activation of NLRP3 Inflammasomes.** The priming signal (**Signal 1**) is the first phase in inducing the transcriptional upregulation of NLRP3, pro-interleukin  $\beta$  (IL-1 $\beta$ ) and pro-IL-18. It begins when Pathogen-associated molecular patterns (PAMPs) and damage-associated molecular patterns (DAMPs), such as LPS, necrosis factor (TNF) and IL-1 $\beta$  bind to Toll-like receptors (TLRs), tumour necrosis factor receptor (TNFRs), Nucleotide Binding Oligomerization Domain Containing 2 (NOD2) and Interleukin-1 receptor (IL-1R) respectively. This results in the transcriptional upregulation of NLRP3, IL1  $\beta$ , and IL18 via activation of myeloid differentiation primary response protein (MyD88) proteins and transcription factors nuclear factor kappa-light-chain-enhancer (NF- $\kappa$ B). **The activation signal (Signal 2)** is the second signal that triggered by PAMPs or DAMPs, such as adenosine triphosphate (ATP) and crystals which stimulate diverse signaling events including ROS, lysosomal damage and K<sup>+</sup> efflux, resulting in oligomerization, and activation of NLRP3 inflammasome complex. The activation of NLRP3 inflammasome leads to two events: (i) When the adaptor protein ASC and inactive pro-caspase-1 couple together, afterwards cleaving pro-caspase-1 into active caspase-1, which sequentially cleaves the pro-IL-1 $\beta$  and pro-IL-18 into their bioactive forms preceding their release. (ii) active caspase-1 also cleaves Gasdermin D into N- GSDMD, therefore pyroptosis induction and IL-1 $\beta$  and IL-18 production. **Non-canonical NLRP3 inflammasome activation** is prompted by the cytosolic LPS detecting by human caspase 4/5 or mouse caspase 11, followed by cleaving and formation of GSDMD membrane pores, leading to potassium efflux, which eventually triggers NLRP3 inflammasomes activation. The activated NLRP3 cleaves the GSDMD to form additional membrane pores and induce the active form of caspase-1, pro-IL-1 $\beta$  and pro-IL-18, resulting in pyroptotic cell death.

**Figure 2: Schematic representation of the mechanisms NLRP3 activation by parasitic molecules.**

*Plasmodium* hemozoin (Hz) is able to stimulate NLRP3 activation via the Src kinase Lyn and the tyrosine kinase Syk. Also, Hz-NLRP3 activation pathway be boosted by the uric acid produced during malaria infection. Hz coated with plasmodial genomic DNA (gDNA), or CpG-oligonucleotides initiate TLR9 translocation leading to NLRP3 activation. While Leishmania membrane glycoconjugate lipophosphoglycan (LPG) initiates the NLRP3 activation through caspase-11 pathway. *T. gondii* induces NLRP3 activation by the soluble total Ag (STAg) rhoptry protein 7 (ROP7), Profilin from *T. gondii* (TgP) and effector proteins GRA15 causing significant up-regulation in NF- $\kappa$ B expression and consequently inflammasome activation via the IL-1 $\beta$ /NF- $\kappa$ B/NLRP3 pathway. Galactose/ N-acetylgalactosamine (Gal/GalNac) lectin of *E. histolytica* promotes NF- $\kappa$ B and MAP kinase-signaling pathways resulting in NLRP3 inflammasome components and pro-IL-1 $\beta$  transcription. *E. histolytica* Peroxiredoxins (Prx) also functions as a key domain that causes NLRP3 activation pathway via the interaction with TLR4 receptor and P2X7 receptor. Also, Gal/GalNac lectin supports the formation of the intracellular junction between EhCP-A5 RGD domain and  $\alpha$ 5 $\beta$ 1 integrin resulting in activation of Src family kinase phosphorylation and pannexin-1 (Panx1) channel to enable ATP release. This free ATP then signals back via P2X7 receptors for promoting the second signal for NLRP3 inflammasome formation. In addition, Soluble schistosomal egg antigens (SEA) as a second signal can induce the activation of NLRP3 inflammasome and IL-1 $\beta$ . The FhCL3 helminth-derived molecules of *Fasciola hepatica* also can promote NLRP3 activation and IL-1 $\beta$  and IL-18 production in non-canonical inflammasome dependent manner.

**Figure 3: Schematic representation of the mechanisms of NLRP3 inhibition by parasitic molecules.** The virulence factor GP63, expressed by all *Leishmania* species inhibits reactive oxygen species (ROS), resulting in NLRP3 inflammasome suppression. While, *Leishmania* RNA virus (LRV) activates TLR3 and TRIF to produce type I IFN resulting in autophagy which induce the expression of Autophagy related 5 (ATG5), that able to block NLRP3 and apoptotic speck-containing (ASC) formation. Also, identically, the Dense granule protein 9 (GRA9) of *T. gondii* suppresses the NLRP3 inflammasome activation by blocking the binding of ASC-NLRP3 and causing disruption of the NLRP3 inflammasome formation. The *E. histolytica* lipid mediator prostaglandin E2 (PGE2) inhibits NLRP3 inflammasome via the PGE2 receptor; as a result of PGE2 signal transduction bonding with the EP4 receptor, adenylyl cyclase activated, subsequently increased intracellular level of cyclic adenylyl monophosphate (cAMP). The Protein Kinase A (PKA) mediates cAMP signalling to directly phosphorylate the Ser295 position of NLRP3 and prevent its ATPase function, resulting in NLRP3 oligomerization inhibition. *T. cruzi* antigen (TcAg) decreases NLRP3 inflammasome expression. Helminth defence molecule-1 of *F. hepatica* (FhHDM-1) (a cathelicidin-like peptide) suppresses NLRP3 inflammasome activation and reducing IL-1 $\beta$  secretion.



**Table 1. Summary of parasitic molecules and their actions to NLRP3**

| Parasite Name         | Parasite molecules                                                   | Action on NLRP3 | By means                                                  | Result                                                                                        | Ref.  |
|-----------------------|----------------------------------------------------------------------|-----------------|-----------------------------------------------------------|-----------------------------------------------------------------------------------------------|-------|
| <i>Plasmodium</i>     | Hemozoin (Hz)                                                        | Activation      | Src kinase Lyn and the tyrosine kinase Syk                | IL-1 $\beta$ production                                                                       | (37)  |
|                       |                                                                      |                 | ?                                                         | Negatively influences conventional CD8a+ type 1 dendritic cell (cDC1) abundance, phagocytosis | (43)  |
|                       | Uric acid                                                            | Enhance         | ?                                                         | IL-1 $\beta$ production                                                                       | (38)  |
|                       | Hz coated with plasmodial genomic DNA (gDNA) or CpG oligonucleotides | Activation      | TLR9                                                      |                                                                                               | (44)  |
| <i>Leishmania</i>     | Parasite membrane glycoconjugate lipophosphoglycan (LPG)             | Activation      | CASP11 activation in macrophages and in vivo              |                                                                                               | (65)  |
|                       | GP63 factor                                                          | Suppression     | ?                                                         | Reduction of IL-1 $\beta$ production                                                          | (52)  |
|                       | RNA virus (LRV) virulence factor                                     |                 | TLR3 and TRIF                                             | Leading to Autophagy related 5 (ATG5) expressions mediating NLRP3 breakdown                   | (36)  |
| <i>T. gondii</i>      | The soluble total Ag (STAg) derived from <i>T. gondii</i> strain RH  | Activation      | ?                                                         | Increasing IL-1 $\beta$ secretion <i>in vitro</i>                                             | (81)  |
|                       | Dense granule proteins 15 (GRA15)                                    |                 | ?                                                         | L-1 $\beta$ and IFN- $\gamma$ production                                                      | (84)  |
|                       | <i>T. gondii</i> secretory protein, rhoptry protein 7 (ROP7)         | Hyperactivation | IL-1 $\beta$ /NF- $\kappa$ B/ NLRP3 pathway               | Up-regulation NF- $\kappa$ B expression                                                       | (51)  |
|                       | Dense granule proteins 9 (GRA9)                                      | Suppression     | ?                                                         | anti-inflammation response                                                                    | (83)  |
| <i>E. histolytica</i> | Gal/GalNAc lectin                                                    | Activation      | Activate NF- $\kappa$ B and MAP kinase-signaling pathways | Pro-IL-1 $\beta$                                                                              | (114) |
|                       | EhCP-A5 RGD binding with macrophages $\alpha$ 5 $\beta$ 1 integrin   |                 | Src family kinase phosphorylation and opening of Panx1    | Release of ATP                                                                                | (118) |
|                       | Peroxiredoxins (Prx)                                                 |                 | Binding with TLR4 receptor and P2X7                       |                                                                                               | (119) |
|                       | Prostaglandin E2 PGE2                                                | Suppression     | Coupling E-prostanoid 4 (EP4)                             | Turned off ATPase affecting self-oligomerization of NLRP3                                     | (113) |
| <i>T. cruzi</i>       | <i>T. cruzi</i> antigen (TcAg)                                       | Suppression     | ?                                                         |                                                                                               | (103) |

|                          |                                                                            |             |                                          |                                                         |       |
|--------------------------|----------------------------------------------------------------------------|-------------|------------------------------------------|---------------------------------------------------------|-------|
| <i>Schistosomal</i>      | Soluble schistosomal egg antigens (SEA)                                    | Activation  | SEA protein functions as a second signal | Resulting in IL-1 $\beta$ production in dendritic cells | (117) |
| <i>Fasciola hepatica</i> | FhCL3 helminth-derived molecules of <i>Fasciola hepatica</i>               | Activation  | ?                                        | Promoting adaptive immune response,                     | (121) |
|                          | <i>Fasciola hepatica</i> products like FhHDM-1 (cathelicidin-like peptide) | Suppression | ?                                        | Reduction in IL-1 $\beta$ secretion by macrophages      | (122) |

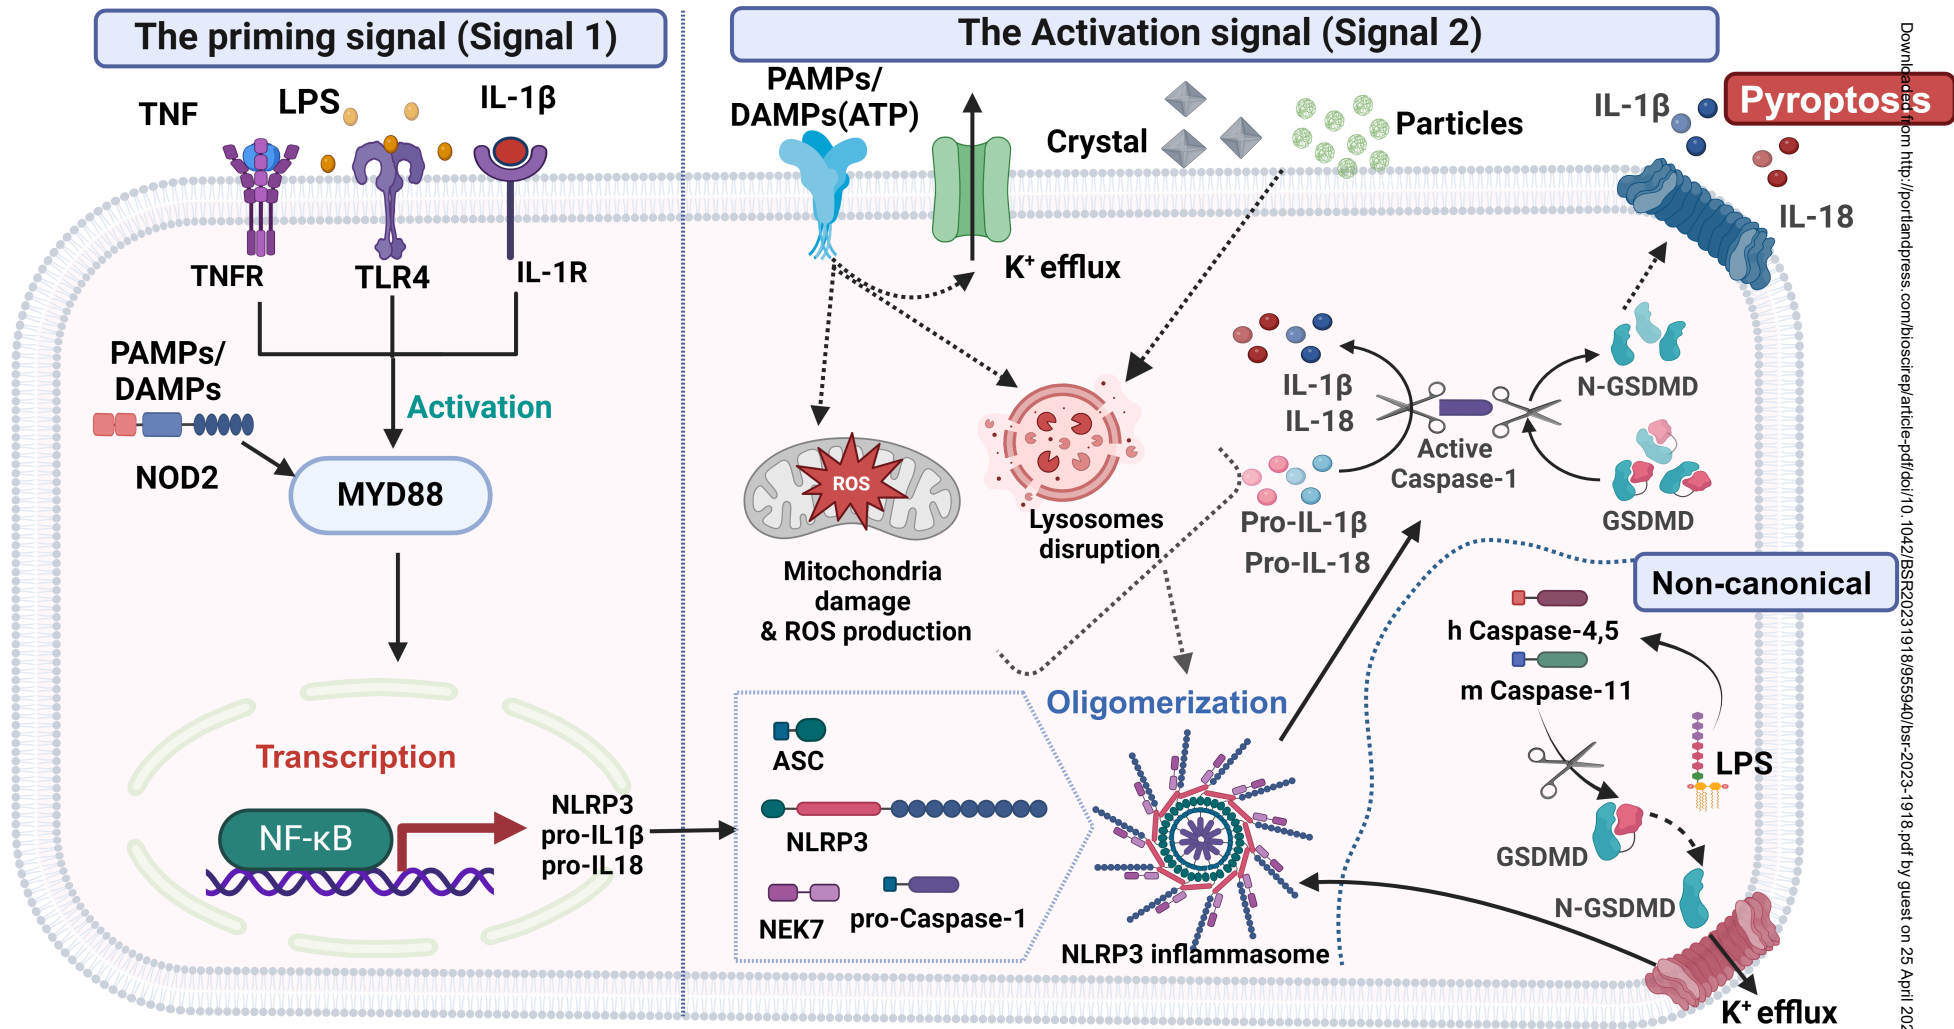

# Parasitic molecules activate NLRP3 inflammasome

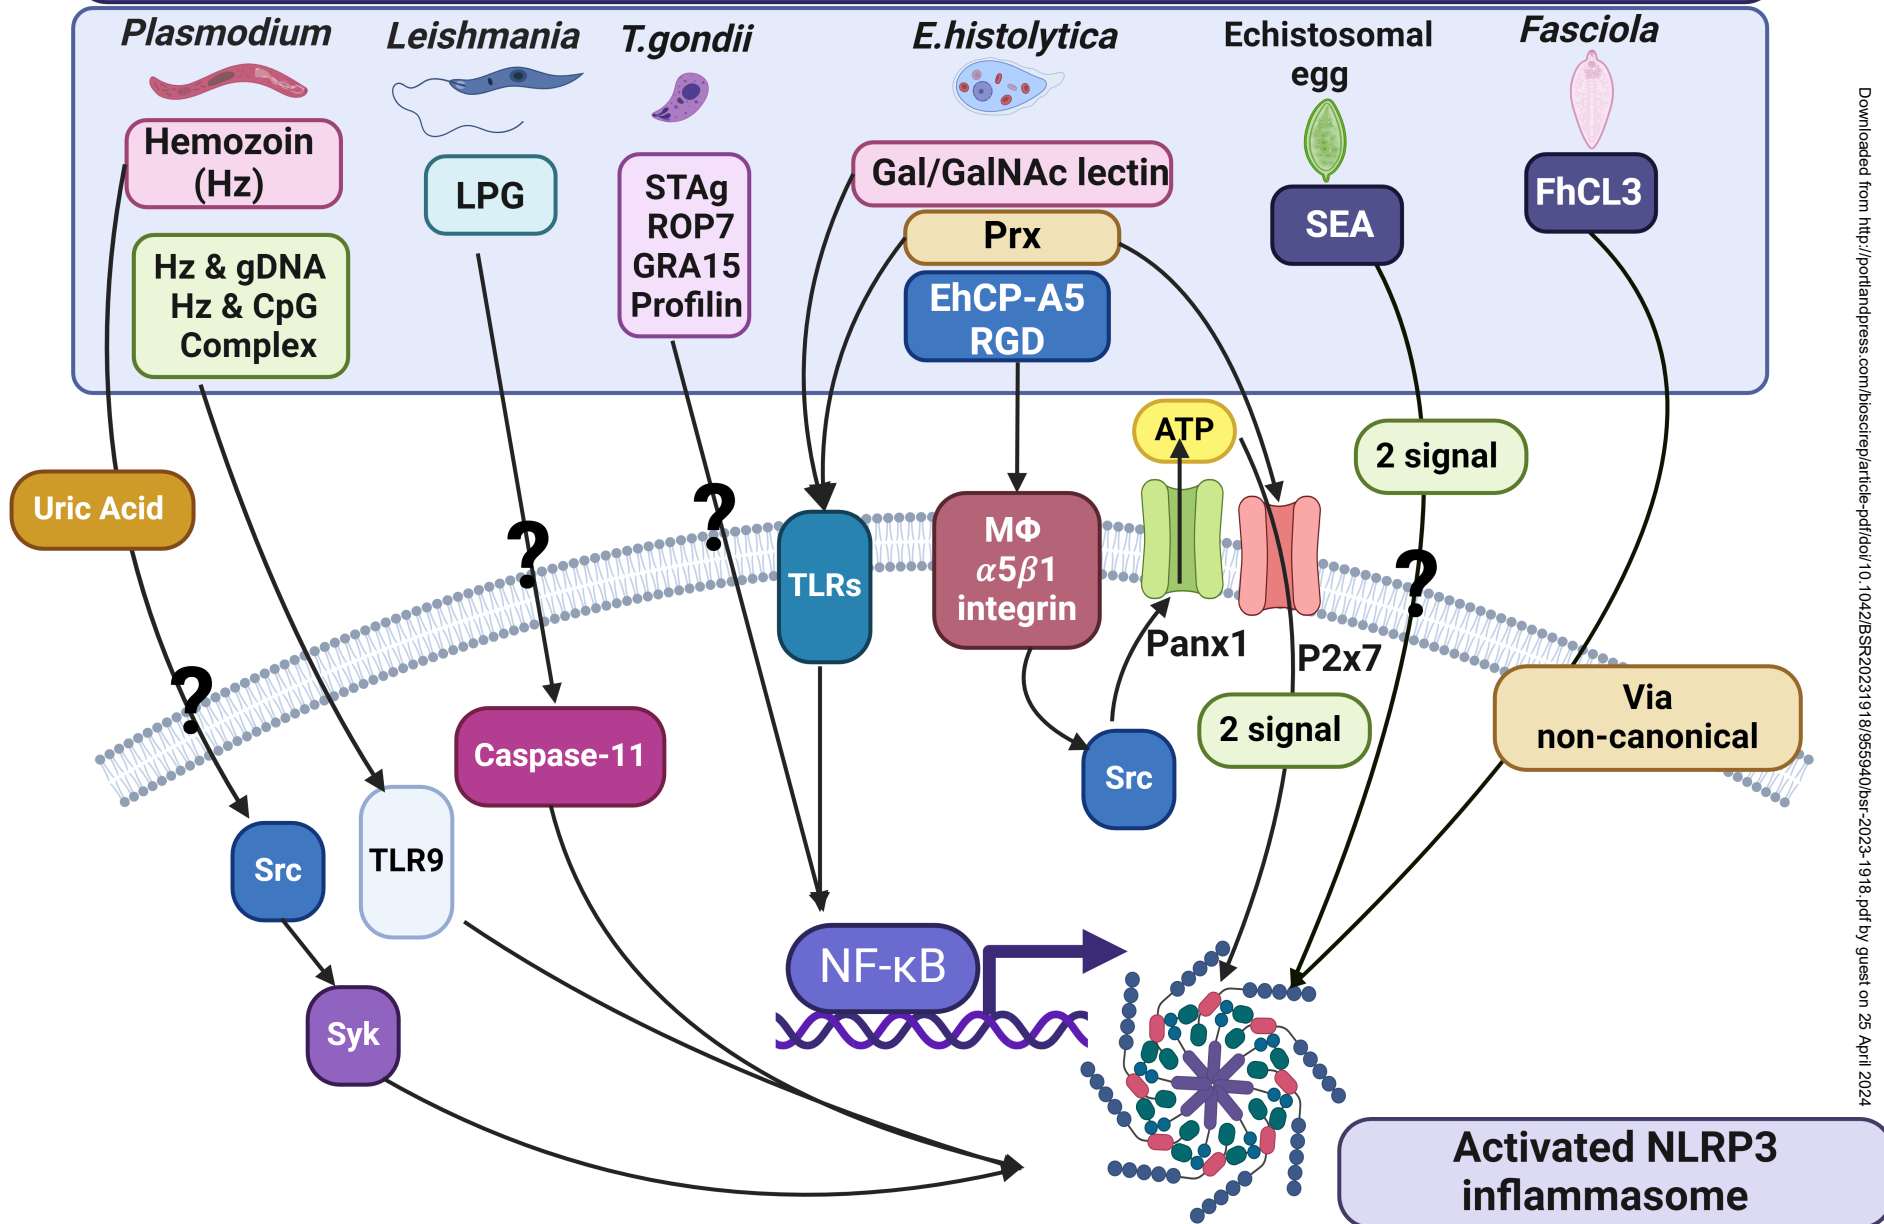

# Parasitic molecules inhibit NLRP3 inflammasome

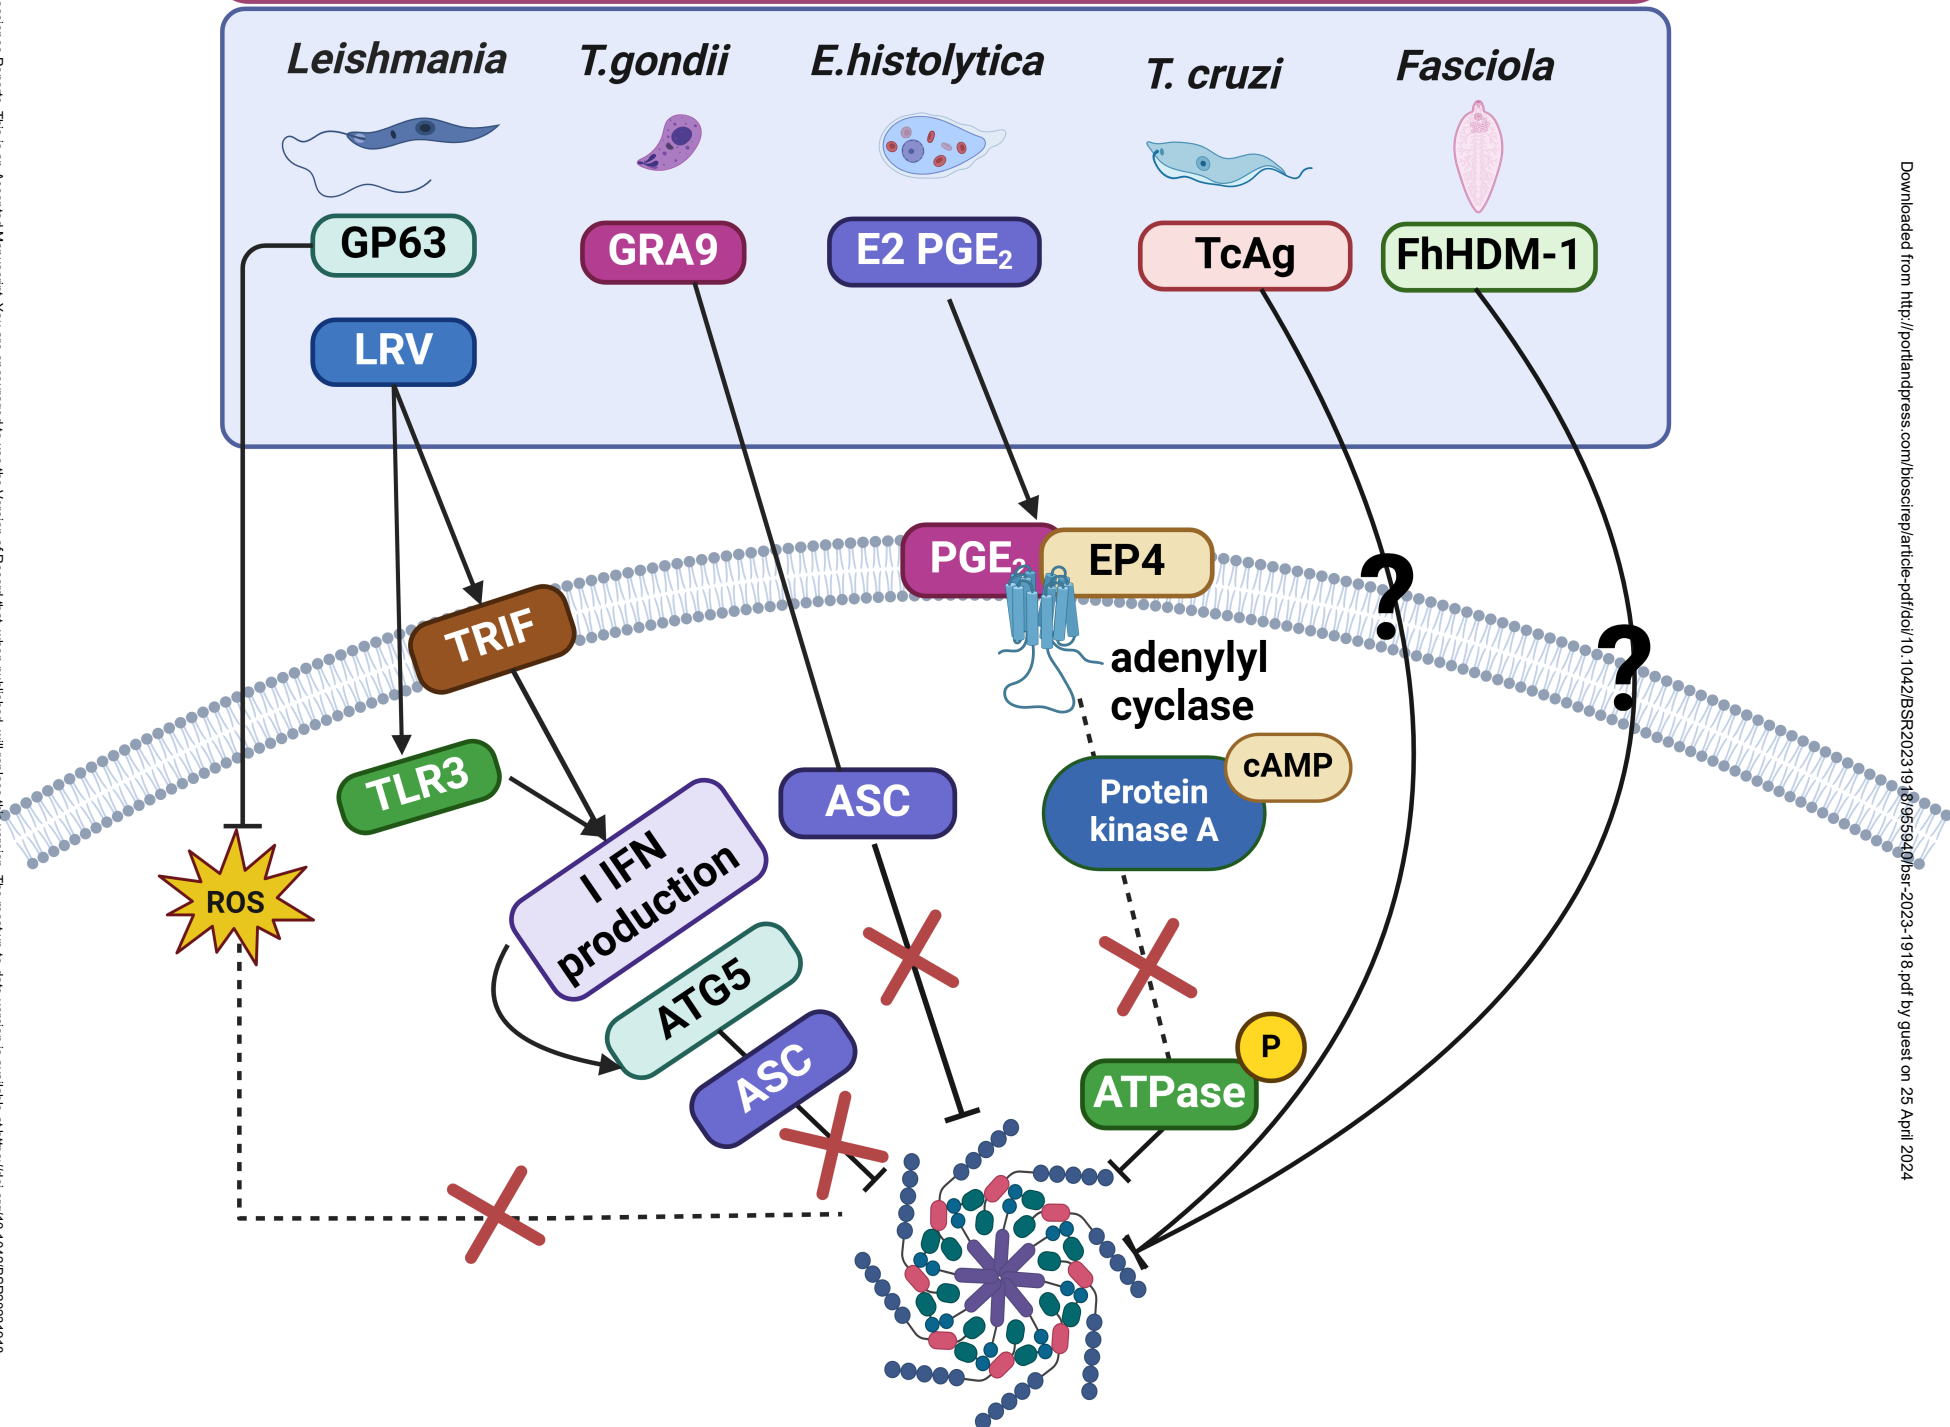

Source: https://port.silverchair.com/bioscirep/article-pdf/955940/bsr-2023-1918.pdf
